# Supplementary material for: Plasmodium falciparum Erythrocyte Membrane Protein 1 Diversity in Seven Genomes – Divide and Conquer
Source: PLoS Comput Biol. 2010 Sep 16;6(9):e1000933. doi: 10.1371/journal.pcbi.1000933 (PMC2940729; doi:10.1371/journal.pcbi.1000933)
Supplement: Figure S5 — Schematic representation of annotated var genes sorted by genome origin. Gene names, 5′UTR class, domain architecture and origin of sequence data (if sequence is not previously reported as var gene) is given. Sequences are noted “F” (Fragment) in comments if predicted not to span a full length exon1, and “HBD” if incorrect contig assembly is suspected followed by the name of the sequence which partially contains unexpected identical sequence stretches. N-terminal segment (NTS), Duffy binding-like (DBL), Cys-rich inter-domain region (CIDR) and acidic terminal segment (ATS) are named according to the distance tree classification. (0.05 MB PDF) [file pcbi.1000933.s006.pdf]

| Gene name  | Parasite | UPS | NTS | Extracellular Domain Structure (Predicted) |           |         |         |         |         |         |         |         |  | ATS  | Comments | Data base source if different |
|------------|----------|-----|-----|--------------------------------------------|-----------|---------|---------|---------|---------|---------|---------|---------|--|------|----------|-------------------------------|
| PF13_0003  | 307      | A1  | A3  | DBLp1.6                                    | CIDRb1    | DBLb2   | DBLy12  | DBLb5   | CIDRb3  | DBLb9   |         |         |  | A2   |          |                               |
| PF11_0008  | 307      | A1  | A6  | DBLp1.5                                    | CIDRy3    | DBLy12  | DBLb5   | CIDRb4  | DBLb9   |         |         |         |  | A2   |          |                               |
| PF11_0521  | 307      | A1  | A6  | DBLp1.7                                    | CIDRt1.4  | DBLb3   | DBLy12  | DBLb5   | CIDRb2  |         |         |         |  | A2   |          |                               |
| PFD1235w   | 307      | A1  | A2  | DBLp1.4                                    | CIDRt1.6  | DBLb3   | DBLy13  | DBLb1   | CIDRb5  |         |         |         |  | A2   |          |                               |
| PFD020c    | 307      | A1  | A7  | DBLp1.2                                    | CIDRt1.1  | DBLb12  | DBLy16  | DBLb1   | CIDRb6  |         |         |         |  | A1   |          |                               |
| PF01640w   | 307      | A2  | A1  | DBLp1.4                                    | CIDRt1.3  | DBLb1   | DBLy15  | DBLb1   | DBLb8   | DBLy15  |         |         |  |      |          |                               |
| PF08_0141  | 307      | A3  | A5  | DBLp1.6                                    | CIDRb2    | DBLb6   | DBLy14  | DBLb5   | DBLb4   |         |         |         |  |      |          |                               |
| PFA0015c   | 307      | A3  | A3  | DBLp1.3                                    | DBLb8     |         |         |         |         |         |         |         |  | A3   |          |                               |
| MAL6P1.314 | 307      | A3  | A3  | DBLp1.3                                    | DBLb8     |         |         |         |         |         |         |         |  | var3 |          |                               |
| PF11820w   | 307      | A3  | A3  | DBLp1.3                                    | DBLb8     |         |         |         |         |         |         |         |  | var3 |          |                               |
| PF10_0001  | 307      | B1  | B3  | DBLp1.20                                   | CIDRb3.1  | DBLb1   | CIDRy4  |         |         |         |         |         |  | B1   |          |                               |
| PF10005w   | 307      | B1  | B3  | DBLp1.16                                   | CIDRb3.4  | DBLb1   | CIDRy12 |         |         |         |         |         |  | B6   |          |                               |
| PFL0935c   | 307      | B1  | B3  | DBLp1.16                                   | CIDRb3.4  | DBLb1   | CIDRy12 |         |         |         |         |         |  | B18  |          |                               |
| PFH1930c   | 307      | B1  | B3  | DBLp1.01                                   | CIDRb3.1  | DBLb1   | CIDRy6  |         |         |         |         |         |  | B2   |          |                               |
| MAL7P1.50  | 307      | B1  | B3  | DBLp1.09                                   | CIDRb2.11 | DBLb1   | CIDRb1  |         |         |         |         |         |  | B1   |          |                               |
| PF08_0142  | 307      | B1  | B3  | DBLp1.09                                   | CIDRb2.11 | DBLb1   | CIDRb1  |         |         |         |         |         |  | B1   |          |                               |
| PFL0005w   | 307      | B1  | B3  | DBLp1.09                                   | CIDRb2.2  | DBLb1   | CIDRb1  |         |         |         |         |         |  | B21  |          |                               |
| PFA0765c   | 307      | B1  | B3  | DBLp1.05                                   | CIDRb2.8  | DBLb1   | CIDRb1  |         |         |         |         |         |  | B1   |          |                               |
| PFA0005w   | 307      | B1  | B3  | DBLp1.11                                   | CIDRb2.8  | DBLb1   | CIDRb1  |         |         |         |         |         |  | B3   |          |                               |
| PFL2665c   | 307      | B1  | B3  | DBLp1.19                                   | CIDRb2.3  | DBLb1   | CIDRb1  |         |         |         |         |         |  | B2   |          |                               |
| PF13_0001  | 307      | B1  | B3  | DBLp1.11                                   | CIDRb2.4  | DBLb1   | CIDRb1  |         |         |         |         |         |  | B21  |          |                               |
| PFE0005w   | 307      | B1  | B3  | DBLp1.11                                   | CIDRb2.4  | DBLb1   | CIDRb1  |         |         |         |         |         |  | B1   |          |                               |
| PF00005w   | 307      | B1  | B3  | DBLp1.09                                   | CIDRb2.4  | DBLb1   | CIDRb1  |         |         |         |         |         |  | B1   |          |                               |
| PF10_0406  | 307      | B1  | B3  | DBLp1.09                                   | CIDRb2.7  | DBLb1   | CIDRb1  |         |         |         |         |         |  | B1   |          |                               |
| MAL7P1.212 | 307      | B1  | B3  | DBLp1.17                                   | CIDRb3.1  | DBLb1   | CIDRb1  |         |         |         |         |         |  | B1   |          |                               |
| MAL8P1.220 | 307      | B1  | B3  | DBLp1.17                                   | CIDRb3.1  | DBLb1   | CIDRb1  |         |         |         |         |         |  | B1   |          |                               |
| PFB1055c   | 307      | B1  | B3  | DBLp1.16                                   | CIDRb3.4  | DBLb1   | CIDRb1  |         |         |         |         |         |  | B1   |          |                               |
| PF13_0364  | 307      | B1  | B3  | DBLp1.16                                   | CIDRb3.4  | DBLb1   | CIDRb6  |         |         |         |         |         |  | B1   |          |                               |
| PF11_0007  | 307      | B1  | B3  | DBLp1.15                                   | CIDRb3.2  | DBLb1   | CIDRb1  |         |         |         |         |         |  | B2   |          |                               |
| MAL6P1.1   | 307      | B1  | B3  | DBLp1.05                                   | CIDRb4.4  | DBLb1   | CIDRb1  |         |         |         |         |         |  | B2   |          |                               |
| PFD1245c   | 307      | B1  | B3  | DBLp1.14                                   | CIDRb4    | DBLb1   | CIDRb1  |         |         |         |         |         |  | B8   |          |                               |
| PFH1120c   | 307      | B1  | B3  | DBLp1.09                                   | CIDRb2.1  | DBLb1   | CIDRb7  |         |         |         |         |         |  | B1   |          |                               |
| PF07_0139  | 307      | B1  | B3  | DBLp1.16                                   | CIDRb3.2  | DBLb1   | CIDRb1  | DBLb4   |         |         |         |         |  | B1   |          |                               |
| PFB0010w   | 307      | B1  | B3  | DBLp1.07                                   | CIDRb2.2  | DBLy11  |         |         |         |         |         |         |  | B1   |          |                               |
| PFD0005w   | 307      | B1  | B3  | DBLp1.05                                   | CIDRb2.10 | DBLb5   | DBLb1   | CIDRb7  |         |         |         |         |  | B1   |          |                               |
| MAL6P1.316 | 307      | B2  | B3  | DBLp1.2                                    | CIDRb1.8  | DBLb12  | DBLb1   | DBLb3   | DBLb12  |         |         |         |  | B3   |          |                               |
| PF08_0140  | 307      | B2  | B5  | DBLp1.6                                    | CIDRb1.6  | DBLb12  | DBLb1   | DBLb1   | CIDRb1  |         |         |         |  | B1   |          |                               |
| PF07_0050  | 307      | B3  | B3  | DBLp1.18                                   | CIDRb6    | DBLb6   | DBLy9   |         |         |         |         |         |  | B6   |          |                               |
| PFD0635c   | 307      | B3  | B3  | DBLp1.1                                    | CIDRb3.1  | CIDRb2  |         |         |         |         |         |         |  | B5   |          |                               |
| PFL1950w   | 307      | B4  | B3  | DBLp1.07                                   | CIDRb4    | DBLb8   | DBLb1   | CIDRb1  |         |         |         |         |  | B8   |          |                               |
| MAL6P1.4   | 307      | B5  | B3  | DBLp1.06                                   | CIDRb3.2  | DBLb5   | DBLy13  | DBLb4   | CIDRy1  | DBLb2   | DBLb7   | DBLb3   |  | B16  |          |                               |
| PFL0020w   | 307      | B5  | B3  | DBLp1.18                                   | CIDRb5    | DBLb15  | DBLy14  | DBLb5   | DBLb4   |         |         |         |  | B3   |          |                               |
| PFD1005c   | 307      | B5  | B3  | DBLp1.08                                   | CIDRb4    | DBLb1   | CIDRy11 |         |         |         |         |         |  | B9   |          |                               |
| PF08_0103  | 307      | B6  | B3  | DBLp1.12                                   | CIDRb2.2  | DBLb1   | CIDRb1  |         |         |         |         |         |  | B19  |          |                               |
| MAL7P1.55  | 307      | B7  | B3  | DBLp1.09                                   | CIDRb2.4  | DBLb1   | CIDRb1  |         |         |         |         |         |  | B19  |          |                               |
| PF08_0108  | 307      | B7  | B3  | DBLp1.2                                    | CIDRb3.1  | DBLb1   | CIDRb1  |         |         |         |         |         |  | B14  |          |                               |
| PFL1955w   | 307      | B7  | B3  | DBLp1.16                                   | CIDRb3.4  | DBLb1   | CIDRb1  |         |         |         |         |         |  | B7   |          |                               |
| MAL6P1.252 | 307      | C1  | B1  | DBLp1.21                                   | CIDRb2.1  | DBLb4   | DBLb1   | CIDRb1  |         |         |         |         |  | B17  |          |                               |
| PFD0955c   | 307      | C1  | B3  | DBLp1.01                                   | CIDRb3.2  | DBLb1   | CIDRy6  |         |         |         |         |         |  | B11  |          |                               |
| PFD1000c   | 307      | C1  | B3  | DBLp1.01                                   | CIDRb3.2  | DBLb1   | CIDRy11 |         |         |         |         |         |  | B19  |          |                               |
| PF07_0049  | 307      | C1  | B3  | DBLp1.17                                   | CIDRb3.1  | DBLb1   | CIDRy7  |         |         |         |         |         |  | B9   |          |                               |
| PFD0630c   | 307      | C1  | B3  | DBLp1.01                                   | CIDRb3.1  | DBLb1   | CIDRy2  |         |         |         |         |         |  | B5   |          |                               |
| PF08_0107  | 307      | C1  | B3  | DBLp1.15                                   | CIDRb3.2  | DBLb1   | CIDRy2  |         |         |         |         |         |  | B2   |          |                               |
| PF07_0051  | 307      | C1  | B3  | DBLp1.17                                   | CIDRb3.1  | DBLb1   | CIDRb1  |         |         |         |         |         |  | B12  |          |                               |
| PFD0615c   | 307      | C1  | B3  | DBLp1.17                                   | CIDRb3.1  | DBLb1   | CIDRb1  |         |         |         |         |         |  | B10  |          |                               |
| PFL1960w   | 307      | C1  | B3  | DBLp1.20                                   | CIDRb3.1  | DBLb1   | CIDRb1  |         |         |         |         |         |  | B23  |          |                               |
| PFD1015c   | 307      | C1  | B3  | DBLp1.24                                   | CIDRb3.4  | DBLb1   | CIDRb1  |         |         |         |         |         |  | B6   |          |                               |
| PFD0625c   | 307      | C1  | B3  | DBLp1.01                                   | CIDRb3.2  | DBLb1   | CIDRb1  |         |         |         |         |         |  | B5   |          |                               |
| PF07_0048  | 307      | C1  | B3  | DBLp1.01                                   | CIDRb3.2  | DBLb1   | CIDRb6  |         |         |         |         |         |  | B7   |          |                               |
| MAL7P1.56  | 307      | C2  | B3  | DBLp1.20                                   | CIDRb3.1  | DBLb1   |         |         |         |         |         |         |  | B1   |          |                               |
| PFD0930c   | 307      | E   | pan | DBLpam1                                    | DBLpam2   | CIDRpan | DBLpam3 | DBLpam4 | DBLpam5 | DBLpam6 | DBLpam7 | DBLpam8 |  | pan1 |          |                               |
| DD2var1    | DD2      | A1  | A6  | DBLp1.7                                    | CIDRt1.4  | DBLb1   | DBLy12  | DBLb1   | CIDRb1  | DBLb9   |         |         |  | A2   |          | supercontig 80                |
| DD2var42   | DD2      | A1  | A5  | DBLp1.2                                    | CIDRt1.7  | DBLb7   | DBLy2   | DBLb1   | CIDRb1  |         |         |         |  | A2   |          | supercontig 64                |
| DD2var09b  | DD2      | A1  | A6  | DBLp1.5                                    | CIDRb2    | DBLy11  | DBLb7   | DBLb1   | CIDRb1  | DBLb9   |         |         |  | A2   |          | supercontig 93                |
| DD2var05   | DD2      | B1  | A5  | DBLp1.6                                    | CIDRb2    | DBLb6   | DBLy12  | DBLb5   | CIDRb4  | DBLb7   | DBLy9   |         |  | A4   |          | supercontig 37                |
| DD2var24   | DD2      | A2  | A1  | DBLp1.1                                    | CIDRt1.2  | DBLb11  | DBLy1   | DBLb1   | CIDRb6  | DBLb7   | DBLy3   | DBLy9   |  | var1 |          | supercontig 5                 |
| DD2var09a  | DD2      | A3  | A8  | DBLp1.2                                    | CIDRt1.5  | DBLy17  |         |         |         |         |         |         |  | F    |          | DD408011                      |
| DD2var40   | DD2      | A2* | A7  | DBLp1.5                                    | CIDRt1.5  | DBLy17  | DBLb1   | CIDRy1  | DBLb2   | DBLb6   |         |         |  | A3   |          | supercontig 13                |
| DD2var43   | DD2      | A3  | A3  | DBLp1.2                                    | CIDRt1.5  | DBLy17  | DBLb5   | CIDRb3  | DBLb7   | DBLy9   |         |         |  | A4   |          | supercontig 54                |
| DD2var22   | DD2      | A3  | A3  | DBLp1.6                                    | CIDRb1    | DBLy12  | DBLb5   | CIDRb4  | DBLb9   |         |         |         |  | A2   |          | supercontig 14                |
| DD2var52   | DD2      | A3  | A5  | DBLp1.5                                    | CIDRb1    | DBLb7   | DBLy11  | DBLb11  |         |         |         |         |  | A4   |          | supercontig 2                 |
| DD2var03   | DD2      | A3  | A4  | DBLp1.5                                    | CIDRb1    | DBLb6   | DBLy13  | DBLb1   | CIDRb4  |         |         |         |  | A6   |          | supercontig 35                |
| DD2var49   | DD2      | B1  | A8  | DBLp1.2                                    | CIDRt1.7  | DBLb3   | DBLy11  | DBLb3   | CIDRy2  | DBLy17  | DBLb4   |         |  | F    |          | supercontig 6                 |
| DD2var23   | DD2      | B1  | B3  | DBLp1.9                                    | CIDRb3.1  | DBLb1   | CIDRb6  | DBLb1   | DBLb4   |         |         |         |  | B20  |          | supercontig 14                |
| DD2var20   | DD2      | B1  | B3  | DBLp1.22                                   | CIDRb3.2  | DBLb5   | DBLy13  | DBLb5   | CIDRy1  | DBLb6   | DBLb6   |         |  | B8   |          | supercontig 5                 |
| DD2var21   | DD2      | B1  | B3  | DBLp1.05                                   | CIDRb5    | DBLb5   | DBLb9   | CIDRy6  | DBLy11  | DBLb4   |         |         |  | B5   |          | supercontig 10                |
| DD2var48   | DD2      | B1  | B3  | DBLp1.06                                   | CIDRb3.1  | DBLb5   | DBLb4   | CIDRy4  | DBLy11  | DBLb4   |         |         |  | B16  |          | supercontig 2                 |
| DD2var28   | DD2      | B1  | B3  | DBLp1.04                                   | CIDRb6    | DBLb5   | DBLy18  | DBLb8   |         |         |         |         |  | B18  |          | supercontig 48                |
| DD2var30   | DD2      | B1  | B3  | DBLp1.06                                   | CIDRb3.1  | DBLb5   | DBLb4   | CIDRy1  |         |         |         |         |  | B3   |          | supercontig 9                 |
| DD2var28   | DD2      | B1  | B3  | DBLp1.06                                   | CIDRb3.1  | DBLb5   | DBLy18  | DBLb8   |         |         |         |         |  | B18  |          | supercontig 19                |
| DD2var30   | DD2      | B1  | B3  | DBLp1.16                                   | CIDRb3.4  | DBLb1   | CIDRb1  | DBLy10  |         |         |         |         |  | B1   |          | supercontig 218               |
| DD2var19   | DD2      | B1  | B3  | DBLp1.05                                   | CIDRb2.2  | DBLb1   | CIDRy9  | DBLb6   | DBLb6   |         |         |         |  | B15  |          | supercontig 25                |
| DD2var18   | DD2      | B1  | B3  | DBLp1.03                                   | CIDRb2.2  | DBLb1   | CIDRb1  |         |         |         |         |         |  | B1   |          | supercontig 93                |
| DD2var37   | DD2      | B1  | B3  | DBLp1.05                                   | CIDRb3.2  | DBLb1   | CIDRy5  |         |         |         |         |         |  | B1   |          | supercontig 35                |
| DD2var31   | DD2      | B1  | B3  | DBLp1.05                                   | CIDRb2.6  | DBLb1   | CIDRb1  |         |         |         |         |         |  | B2   |          | supercontig 13                |
| DD2var20   | DD2      | B1  | B3  | DBLp1.09                                   | CIDRb2.7  | DBLb1   | CIDRb6  |         |         |         |         |         |  | B2   |          | supercontig 58                |
| DD2var39   | DD2      | B1  | B3  | DBLp1.10                                   | CIDRb2.8  | DBLb1   | CIDRb1  |         |         |         |         |         |  | B18  |          | supercontig 17                |
| DD2var47   | DD2      | B2  | B3  | DBLp1.2                                    | CIDRt1.1  | DBLb12  | DBLb6   | DBLb1   | CIDRb1  |         |         |         |  | B16  |          | supercontig 2                 |
| DD2var01a  | DD2      | B3  | B3  | DBLp1.06                                   | CIDRb3.1  | DBLb5   | DBLy5   | DBLb1   | CIDRb1  |         |         |         |  | B13  |          | AAAT5396                      |
| DD2var35   | DD2      | B3  | B3  | DBLp1.02                                   | CIDRb3.1  | DBLb5   | DBLy5   | DBLb1   | CIDRb1  |         |         |         |  | B13  |          | supercontig 2                 |
| DD2var33   | DD2      | B3  | B3  | DBLp1.09                                   | CIDRb2.1  | DBLb1   | CIDRb3  |         |         |         |         |         |  | B10  |          | supercontig 26                |
| DD2var11   | DD2      | B4  | B3  | DBLp1.15                                   | CIDRb3.2  | DBLb1   | CIDRb1  |         |         |         |         |         |  | B15  |          | supercontig 21                |
| DD2var44   | DD2      | B5  | B3  | DBLp1.23                                   | CIDRb3.1  | DBLb1   | CIDRb5  |         |         |         |         |         |  | B4   |          | supercontig 26                |
| DD2var46   | DD2      | B7  | B3  | DBLp1.05                                   | CIDRb2.5  | DBLb8   | DBLb1   | CIDRb7  |         |         |         |         |  | B12  |          | supercontig 21                |
| DD2var13   | DD2      | B7  | B3  | DBLp1.08                                   | CIDRb3.5  | DBLb8   | DBLb1   | CIDRb1  |         |         |         |         |  | B13  |          | supercontig 2                 |
| DD2var07   | DD2      | C1  | B3  | DBLp1.16                                   | CIDRb2.3  | DBLb1   | CIDRb5  |         |         |         |         |         |  | F    |          | supercontig 208               |
| DD2var26   | DD2      | C1  | B3  | DBLp1.19                                   | CIDRb2.3  | DBLb1   | CIDRb5  |         |         |         |         |         |  | B7   |          | supercontig 187               |
| DD2var41   | DD2      | C1  | B3  | DBLp1.16                                   | CIDRb3.4  | DBLb10  | DBLb1   | CIDRb1  |         |         |         |         |  | B13  |          | supercontig 394               |
| DD2var34   | DD2      | C1  | B1  | DBLp1.01                                   | CIDRb3.1  | DBLy16  | DBLb1   | CIDRy6  |         |         |         |         |  | B11  |          | supercontig 344               |
| DD2var36   | DD2      | C1  | B1  | DBLp1.21                                   | CIDRb2.1  | DBLb2   | DBLy10  | DBLb2   | CIDRy6  |         |         |         |  | B17  |          | supercontig 274               |
| DD2var38   | DD2      | C1  | B4  | DBLp1.21                                   | CIDRb2.1  | DBLb2   | DBLy10  | DBLb8   | CIDRb2  |         |         |         |  | B7   |          | supercontig 193               |
| DD2var45   | DD2      |     |     |                                            |           |         |         |         |         |         |         |         |  |      |          |                               |
