# Supplementary material for: Plasmodium falciparum Erythrocyte Membrane Protein 1 Diversity in Seven Genomes – Divide and Conquer
Source: PubMed Central journal article supplement (PMC2940729; doi:10.1371/journal.pcbi.1000933), 2010-09-16
Supplement: pcbi.1000933.s010.pdf [file pcbi.1000933.s010.pdf]

**Table S1**

**Domain class specific homology blocks**

| <b>Domain</b> [Number of domains]     | <b>HB combination</b> | <b>Found in domain / other</b> | <b>Domain coverage</b> |
|---------------------------------------|-----------------------|--------------------------------|------------------------|
| <b>DBL<math>\alpha</math></b> [301]   | (19)                  | 300 / 6                        | 99.7%                  |
|                                       | (17, 19)              | 299 / 1                        | 99.3%                  |
| <b>DBL<math>\beta</math></b> [119]    | (62)                  | 119 / 13                       | 100%                   |
|                                       | (53, 61)              | 118 / 0                        | 99.2%                  |
| <b>DBL<math>\gamma</math></b> [145]   | (15, 45)              | 109 / 0                        | 75.2%                  |
|                                       | (16, 45)              | 88 / 0                         | 60.7%                  |
|                                       | (15, 18)              | 86 / 0                         | 59.3%                  |
|                                       | (86)                  | 70 / 1                         | 48.3%                  |
|                                       | (94)                  | 58 / 3                         | 40.0%                  |
|                                       | (82, 45)              | 48 / 0                         | 33.1%                  |
|                                       | (364)                 | 9 / 0                          | 6.2%                   |
|                                       | (11, 275)             | 9 / 0                          | 6.2%                   |
|                                       | All above united      | 144 / 4                        | 99.3%                  |
| <b>DBL<math>\delta</math></b> [254]   | (15, 9)               | 253 / 0                        | 99.6%                  |
|                                       | (35)                  | 213 / 1                        | 83.9%                  |
| <b>DBL<math>\zeta</math></b> [61]     | (92)                  | 61 / 0                         | 100%                   |
|                                       | (93)                  | 61 / 0                         | 100%                   |
| <b>DBL<math>\epsilon</math></b> [133] | (76)                  | 87 / 0                         | 65.4%                  |
|                                       | (48, 78)              | 54 / 1                         | 40.6%                  |
|                                       | (108)                 | 43 / 0                         | 32.3%                  |
|                                       | (310)                 | 20 / 0                         | 15.0%                  |
|                                       | (265)                 | 12 / 0                         | 9.0%                   |
|                                       | (260)                 | 12 / 1                         | 9.0%                   |
| All above united                      | 127 / 2               | 95.5%                          |                        |
| <b>CIDR<math>\alpha</math></b> [270]  | (23)                  | 268 / 3                        | 99.3%                  |
|                                       | (32)                  | 228 / 0                        | 84.4%                  |
| <b>CIDR<math>\beta</math></b> [170]   | (50)                  | 169 / 1                        | 99.4%                  |
| <b>CIDR<math>\gamma</math></b> [94]   | (85) U (176) U        | 93 / 0                         | 98.9%                  |
|                                       | (212) U (384) U       |                                |                        |
|                                       | (522) U (565) U       |                                |                        |
|                                       | (22, 521) U (627)     |                                |                        |
| <b>CIDR<math>\delta</math></b> [19]   | (202)                 | 19 / 0                         | 100%                   |
