# Supplementary figures and images for: Plasmodium falciparum Erythrocyte Membrane Protein 1 Diversity in Seven Genomes – Divide and Conquer
Source: PLOS journal article supplement (doi:10.1371/journal.pcbi.1000933), 2010-09-16

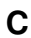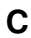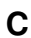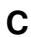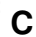

Supplement: S4 (10.1371/journal.pcbi.1000933.s004) [file journal.pcbi.1000933.s004]

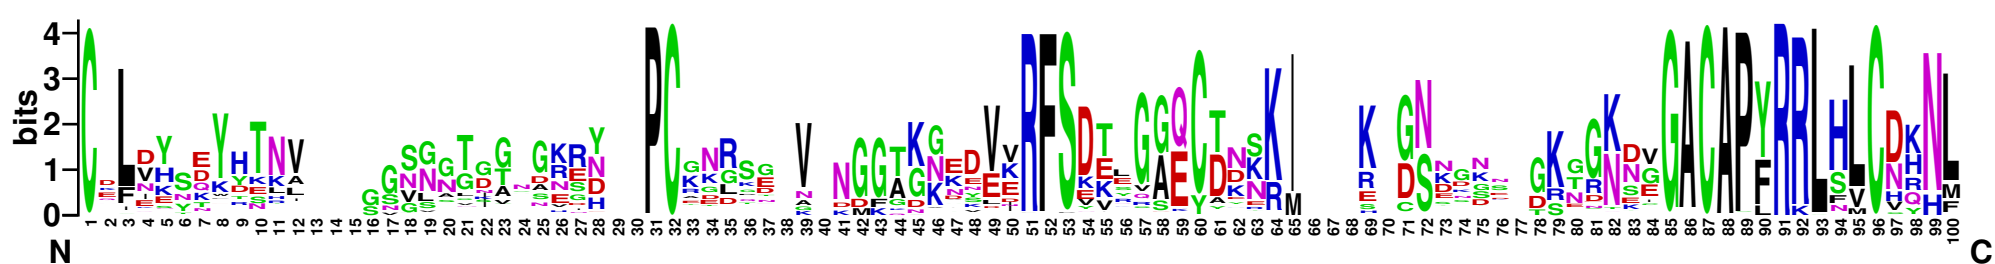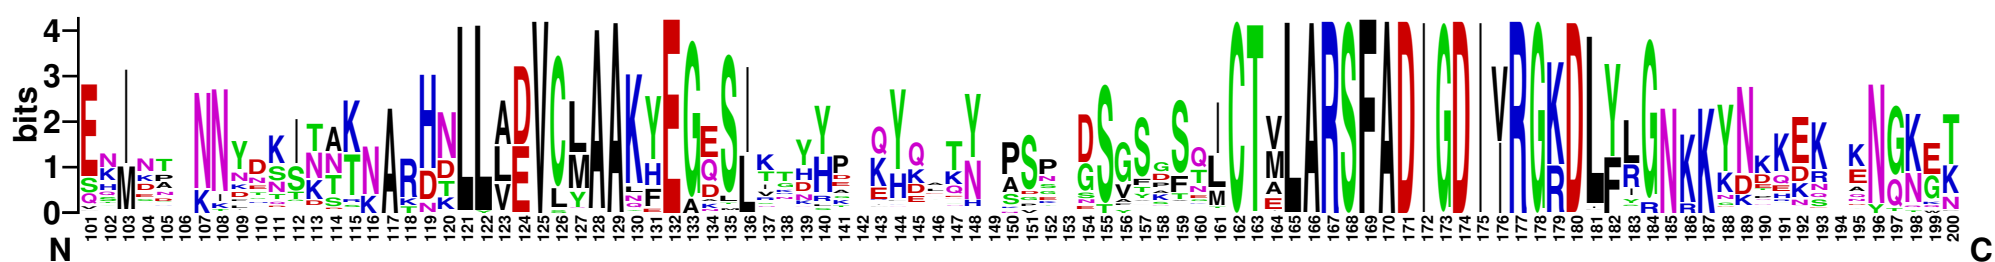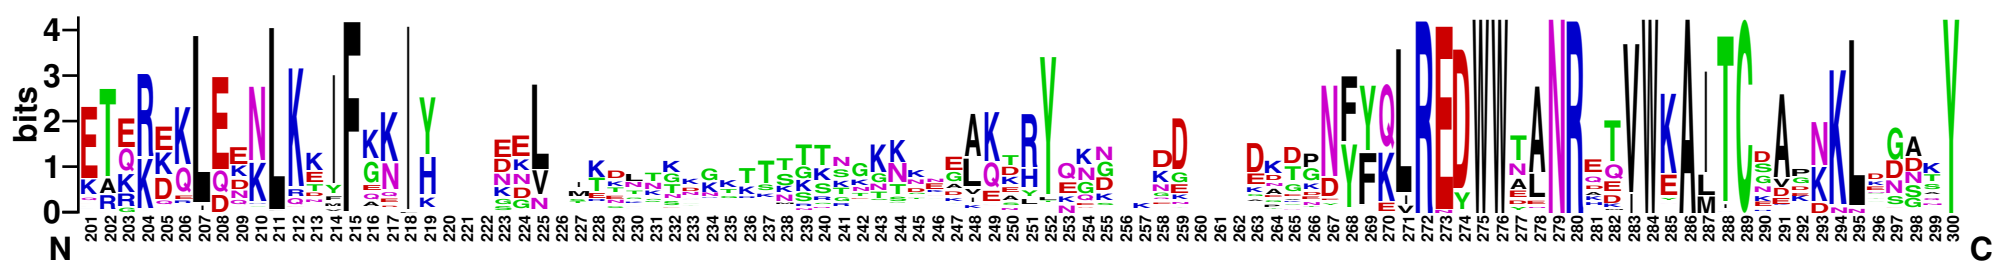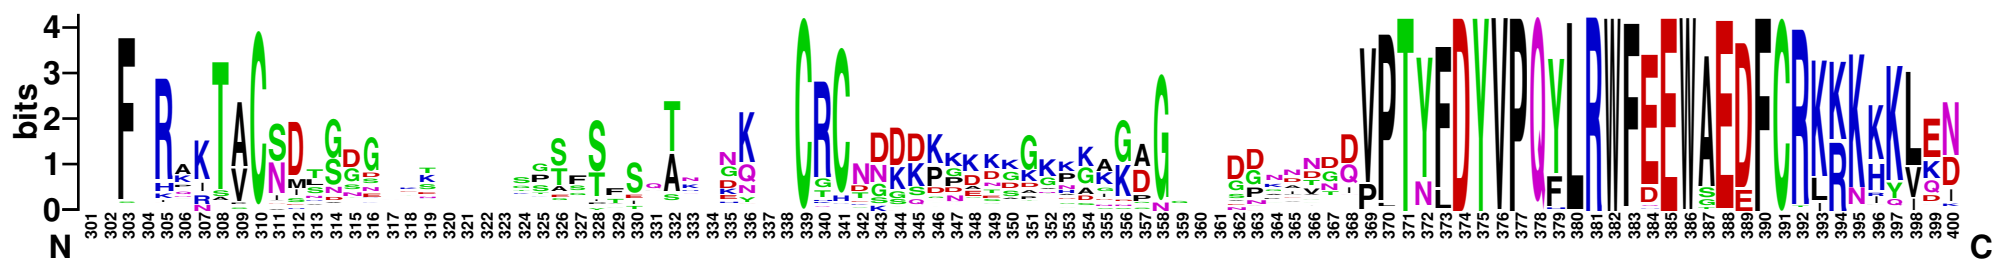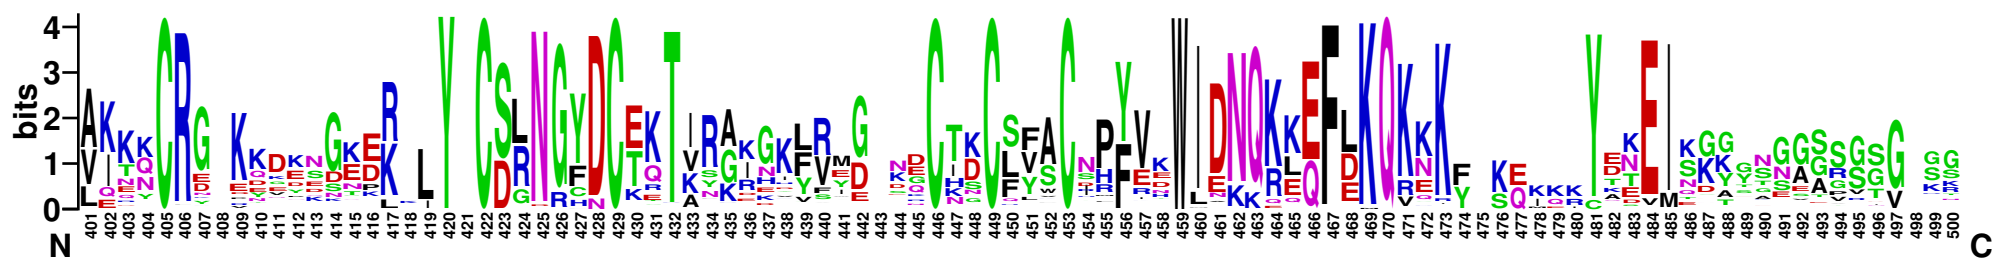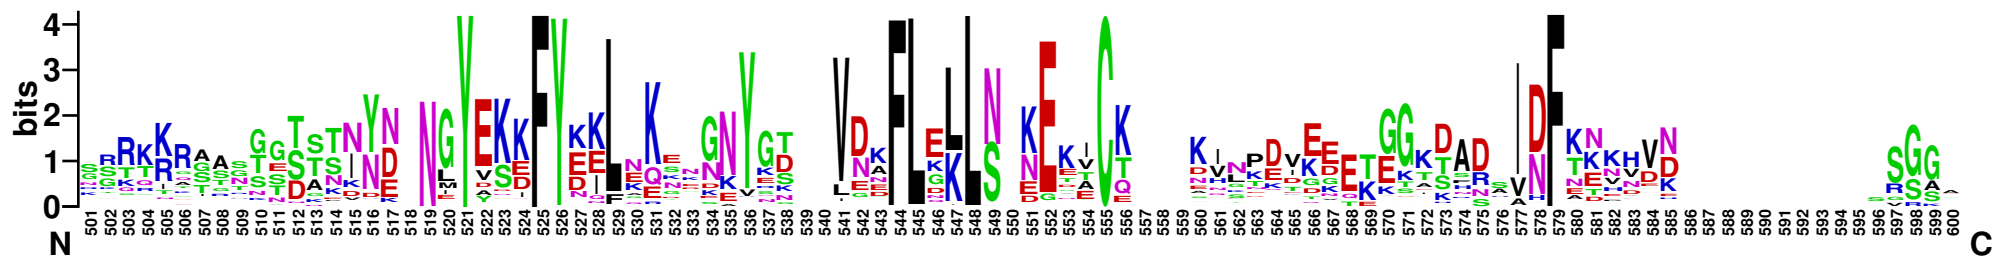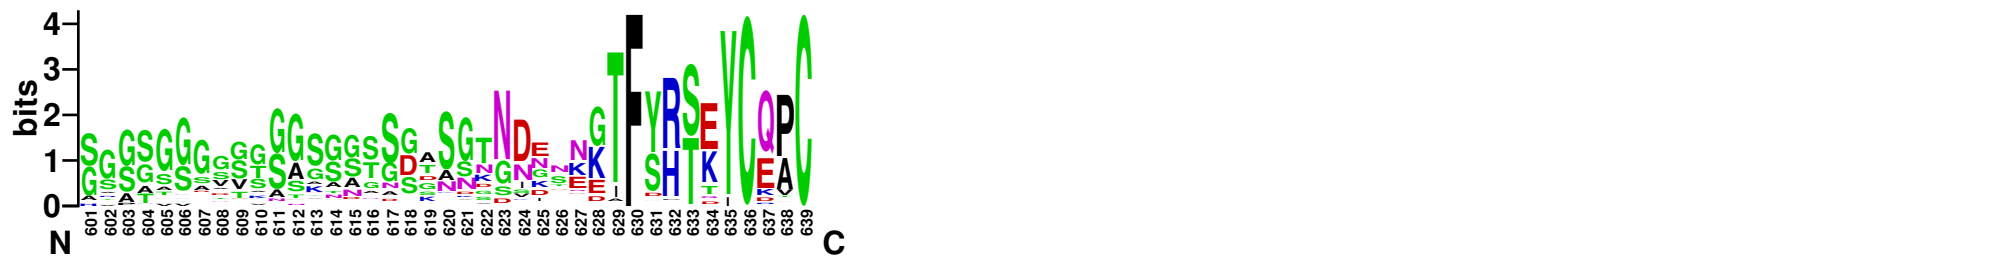

Supplement: S4 (10.1371/journal.pcbi.1000933.s004) [file journal.pcbi.1000933.s004]

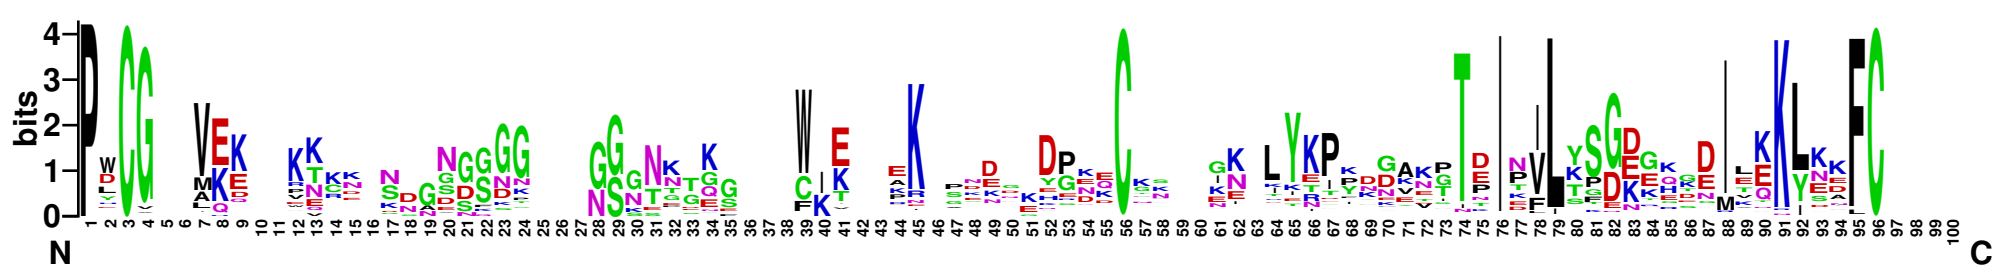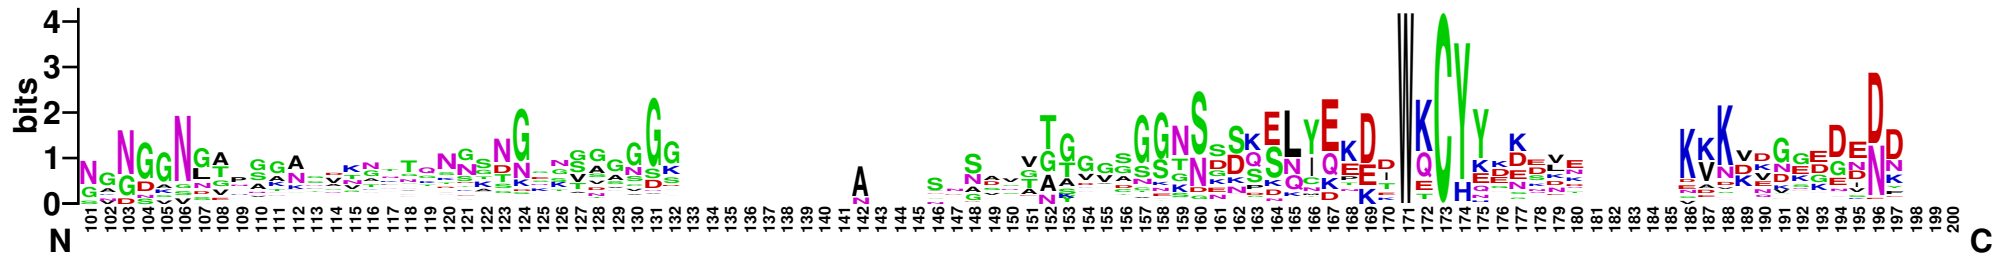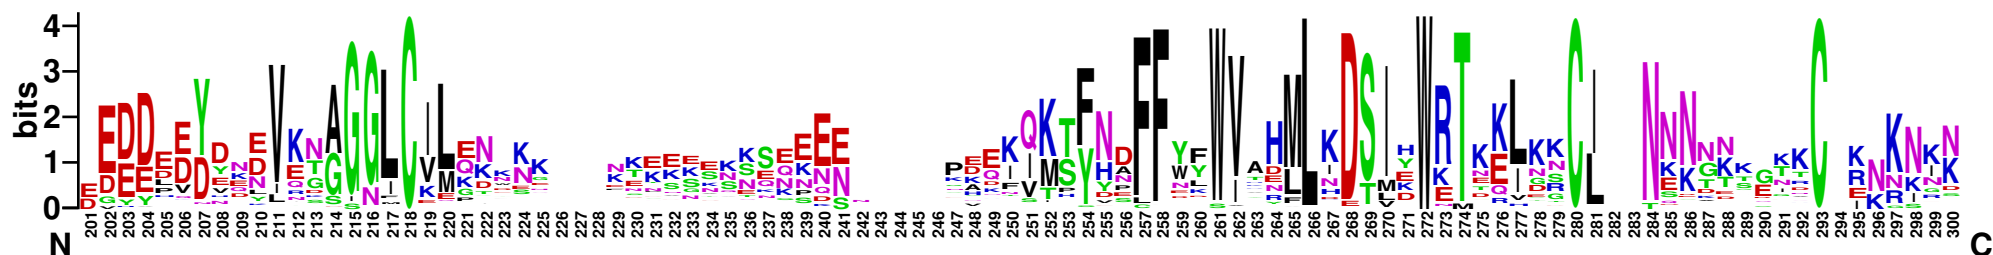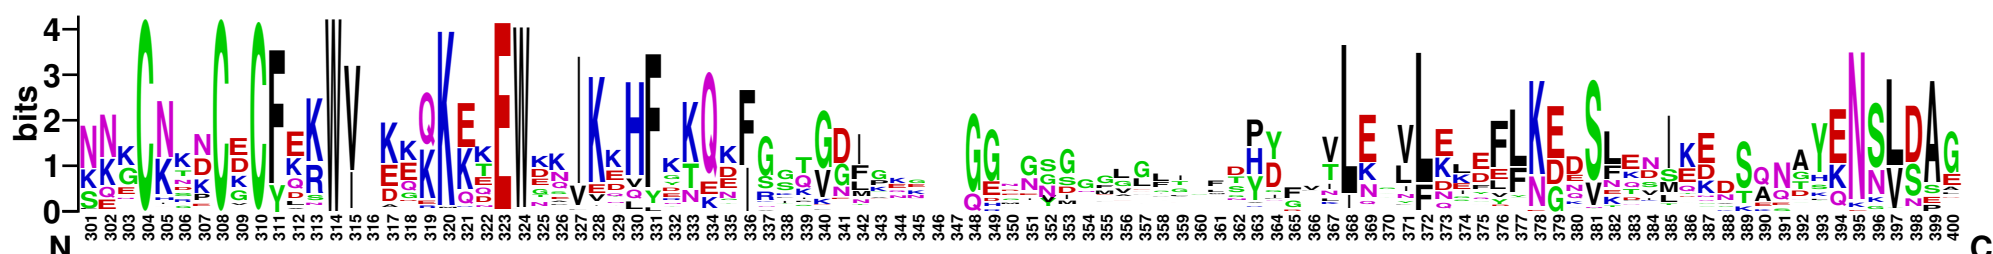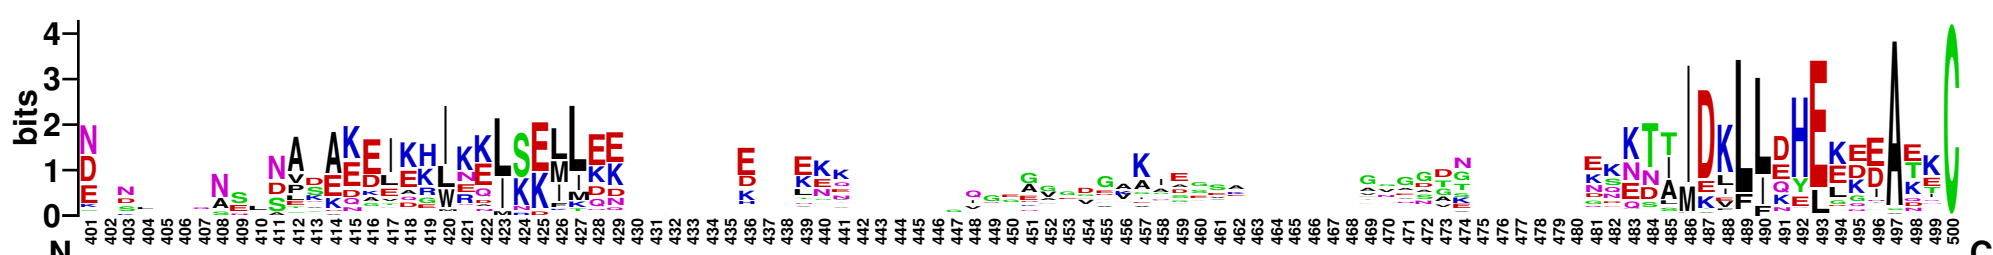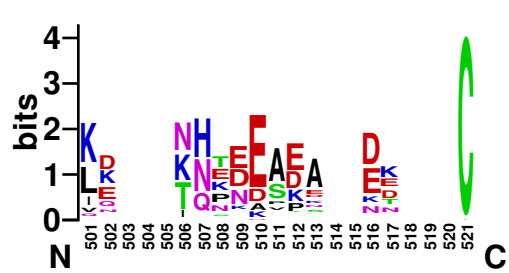

Supplement: S4 (10.1371/journal.pcbi.1000933.s004) [file journal.pcbi.1000933.s004]

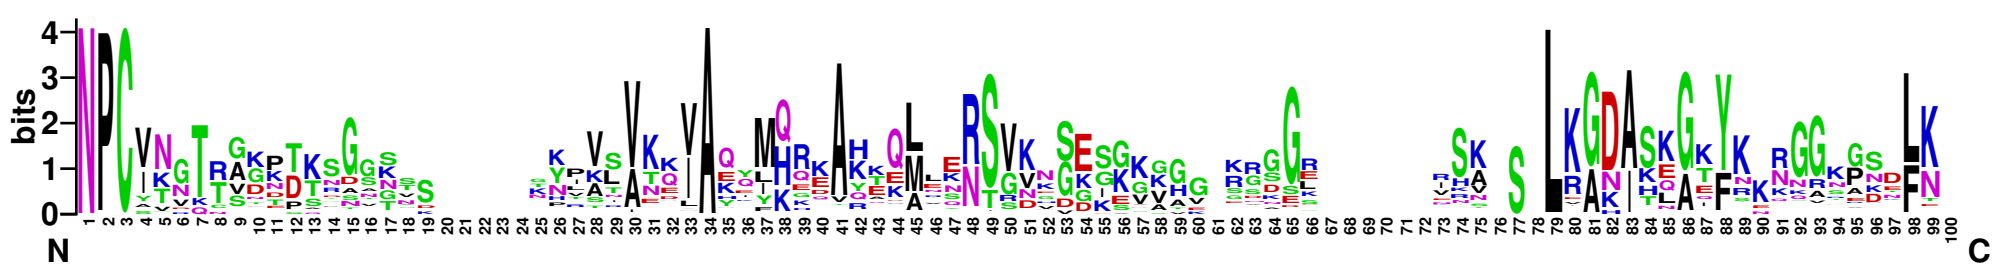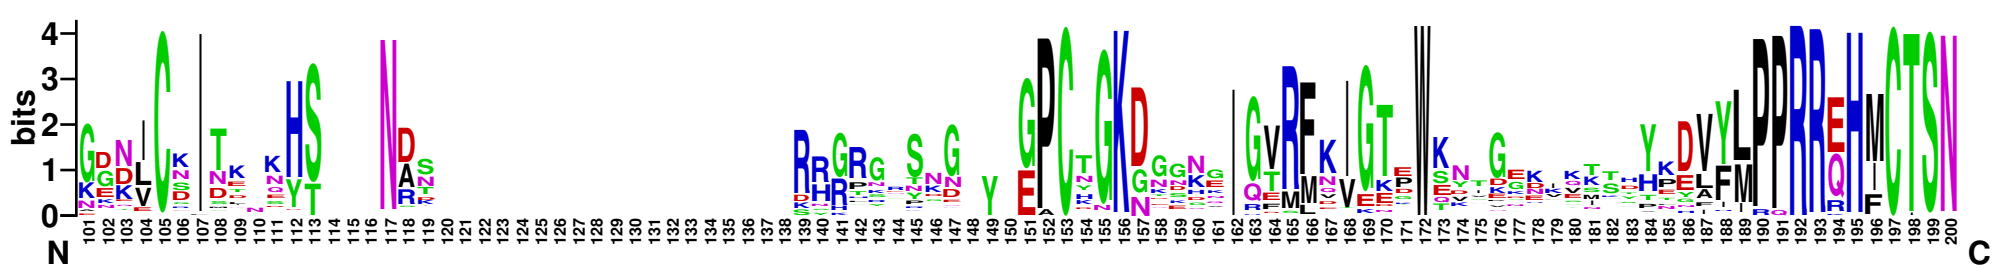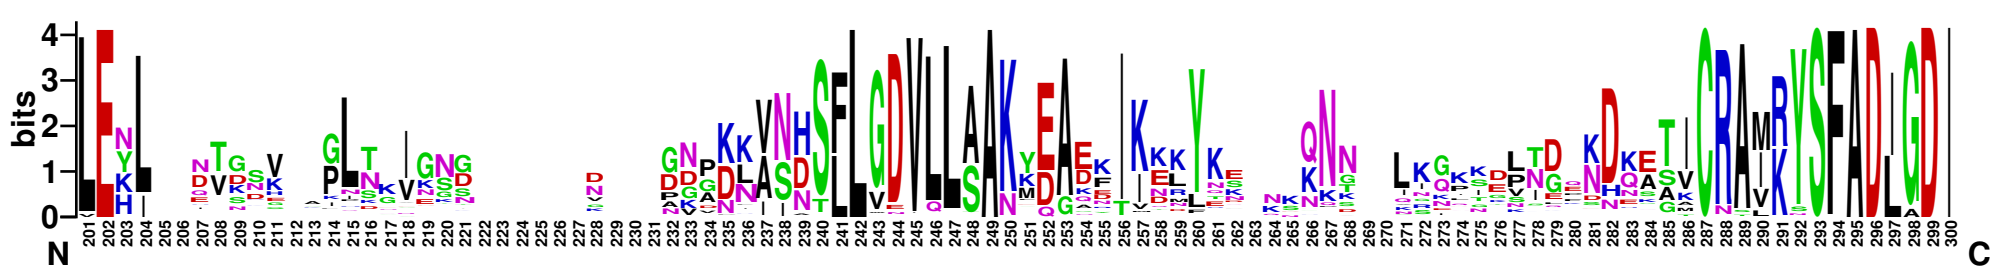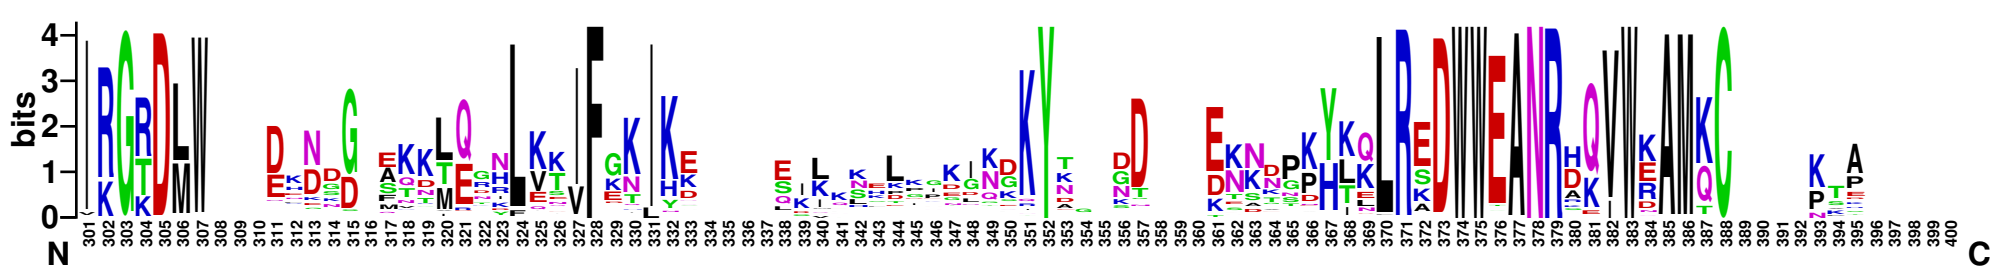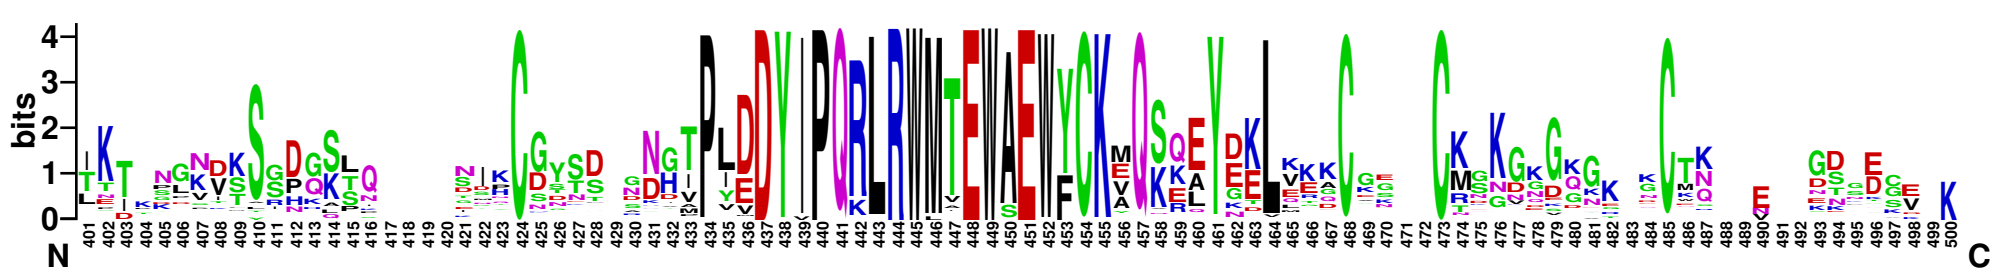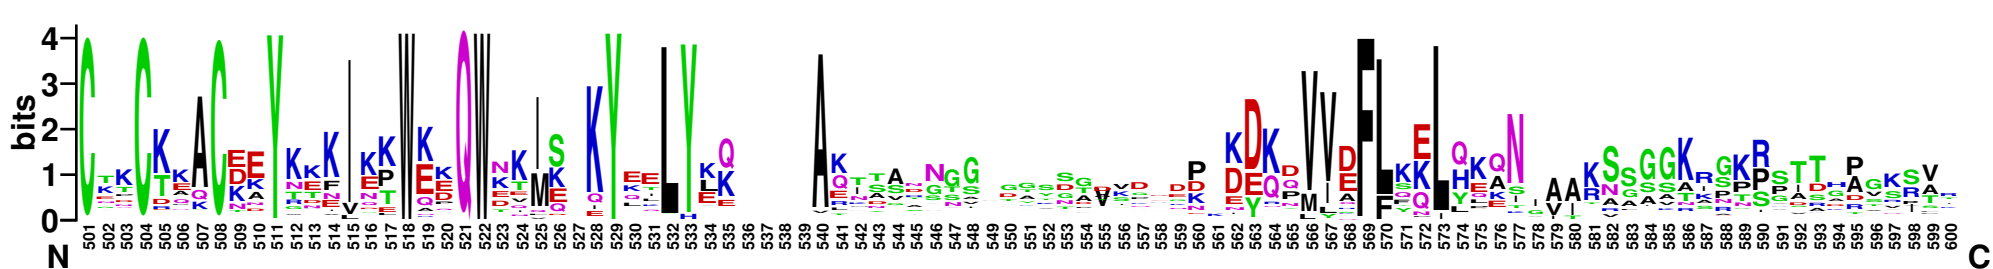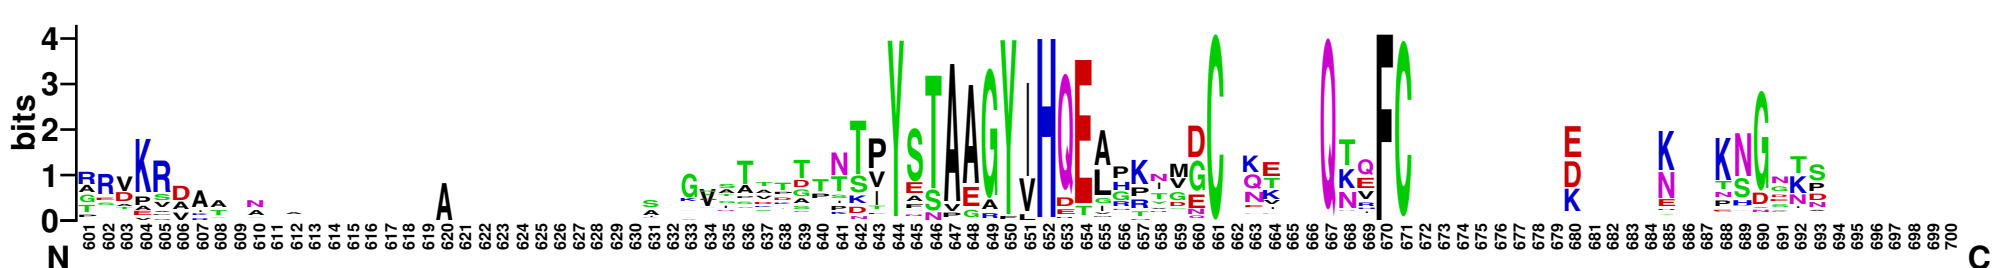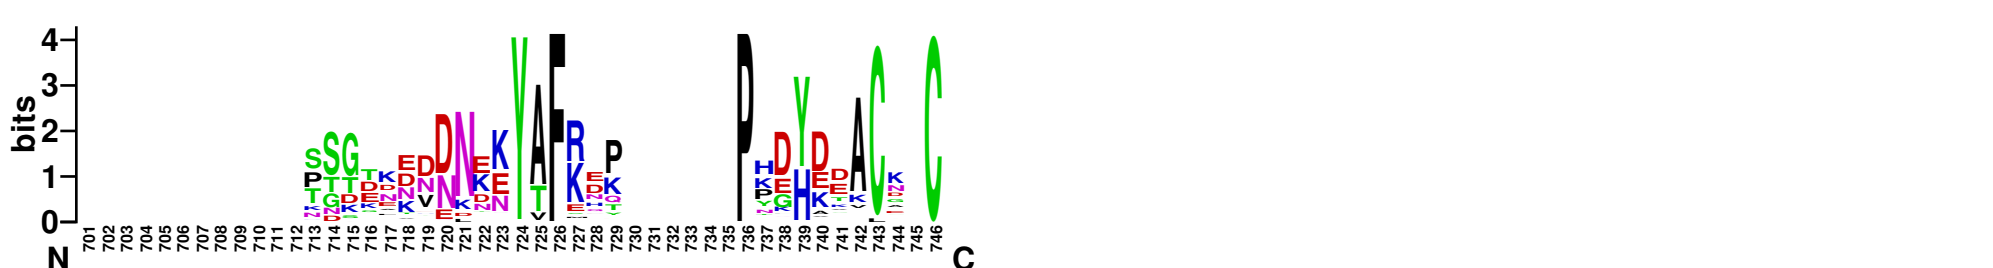

Supplement: S4 (10.1371/journal.pcbi.1000933.s004) [file journal.pcbi.1000933.s004]

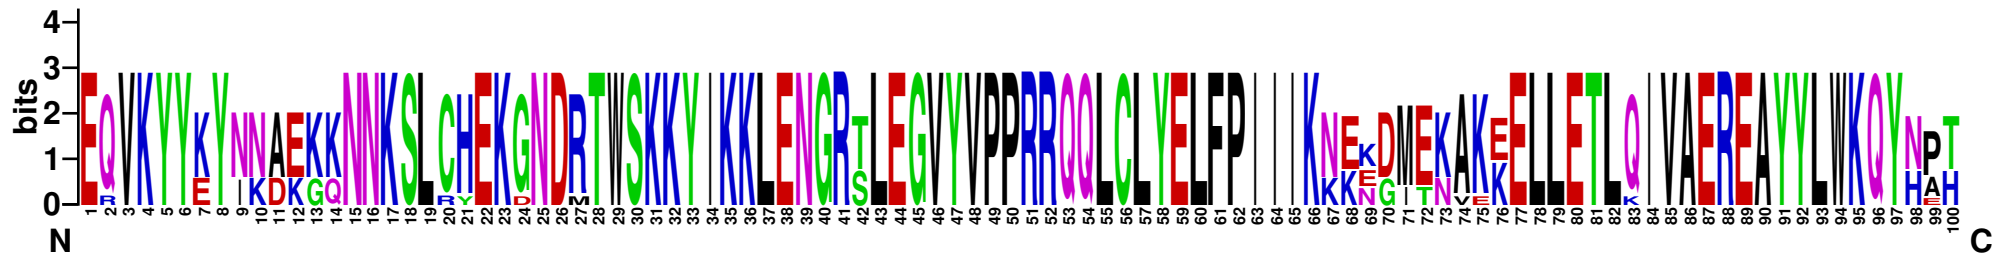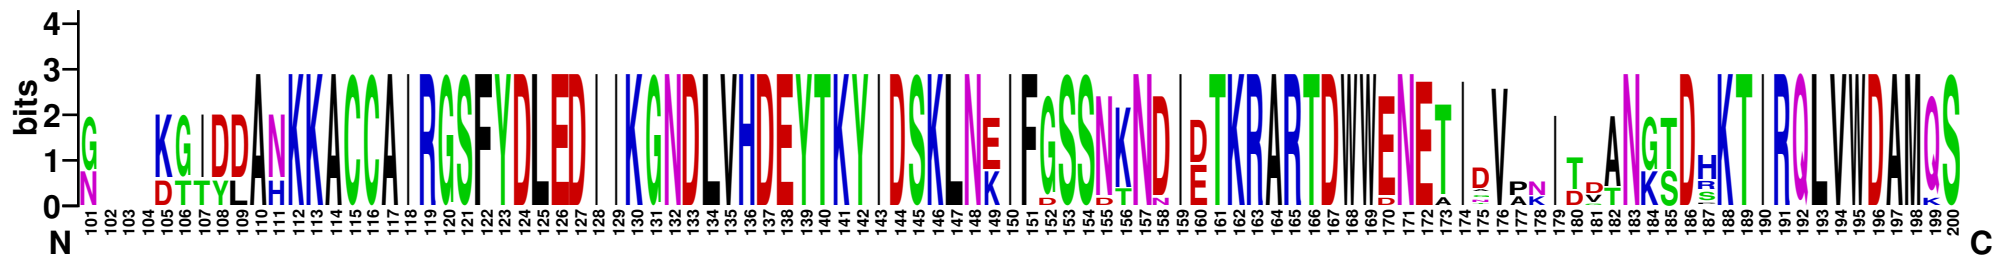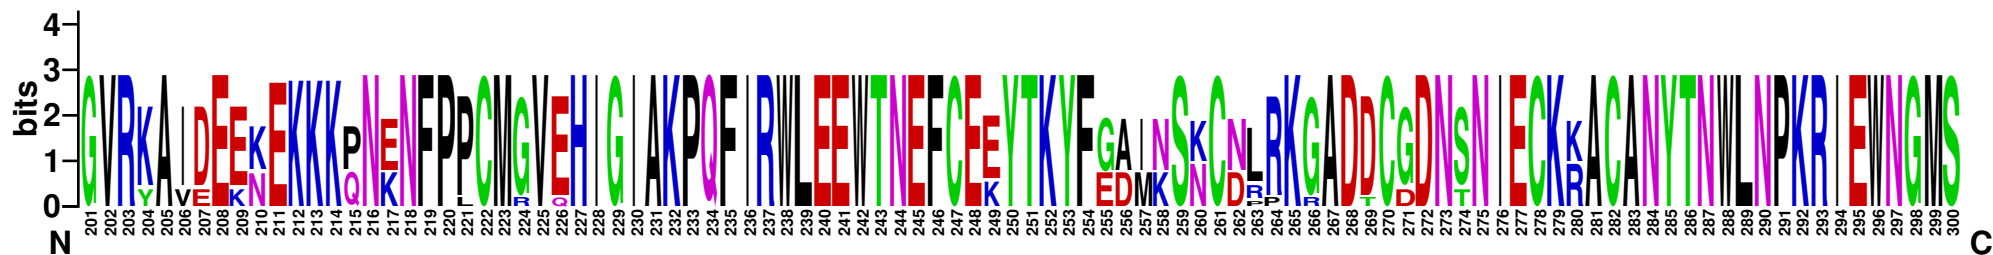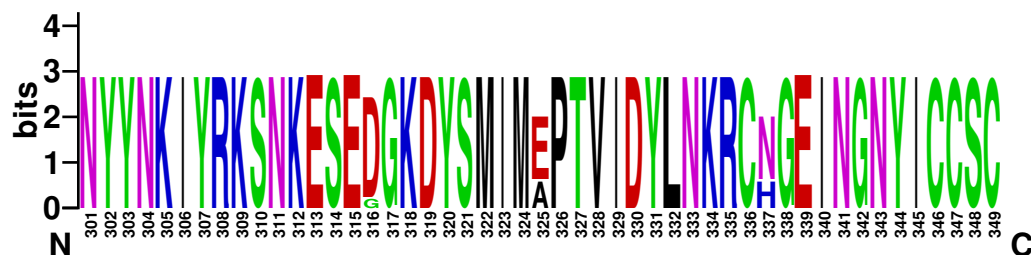

Supplement: S4 (10.1371/journal.pcbi.1000933.s004) [file journal.pcbi.1000933.s004]

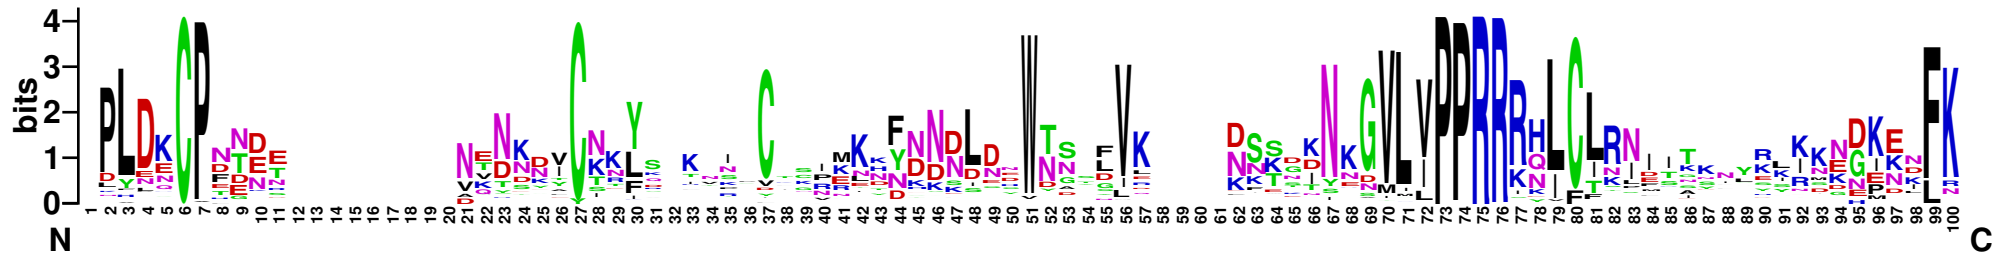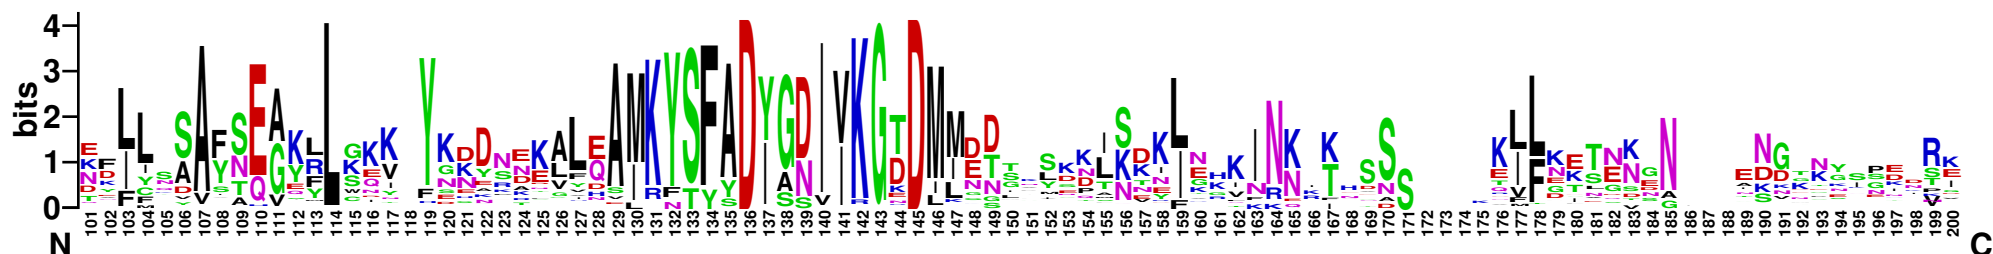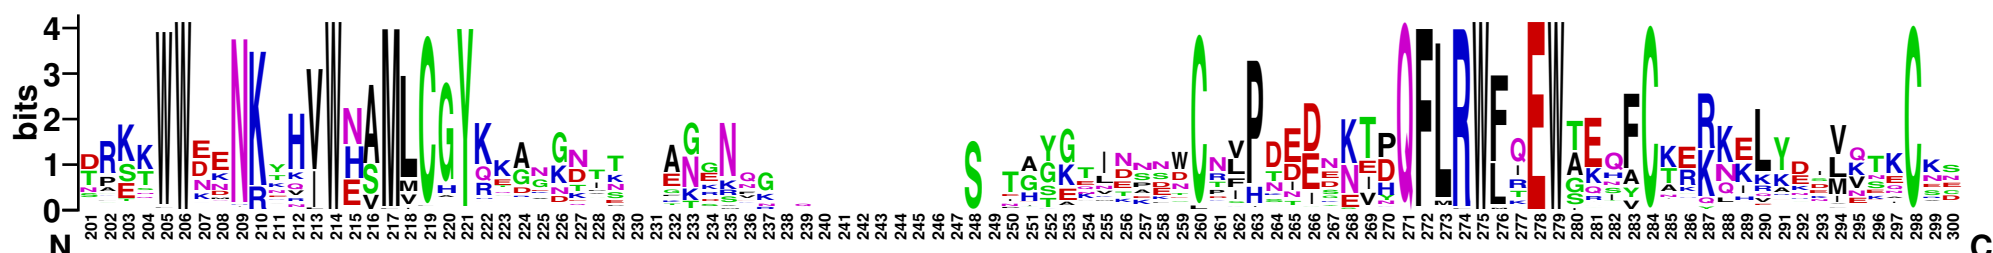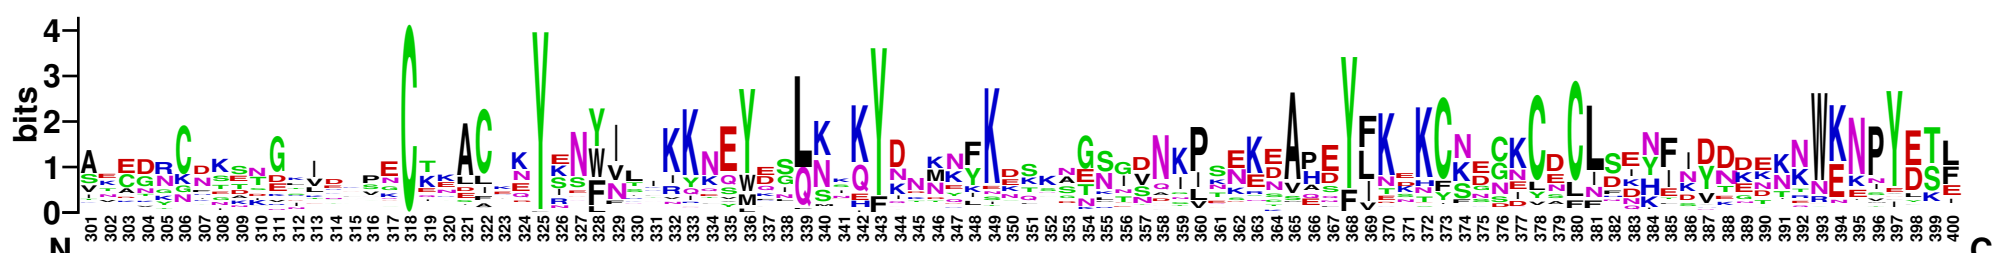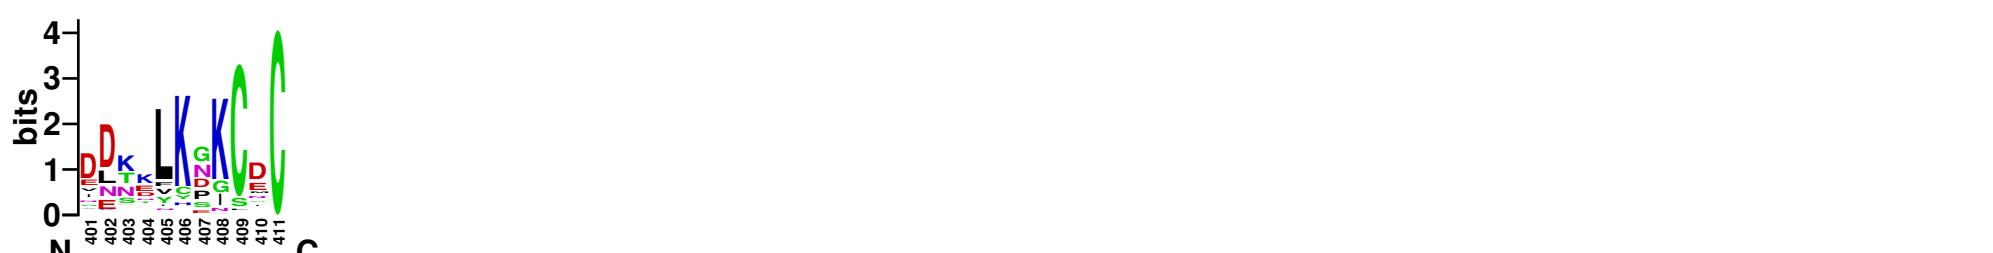

Supplement: S4 (10.1371/journal.pcbi.1000933.s004) [file journal.pcbi.1000933.s004]

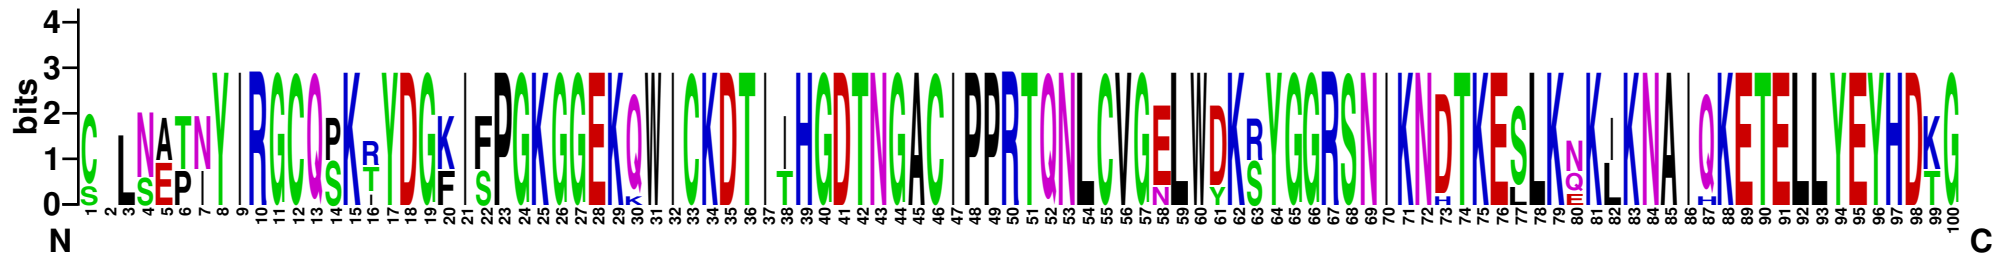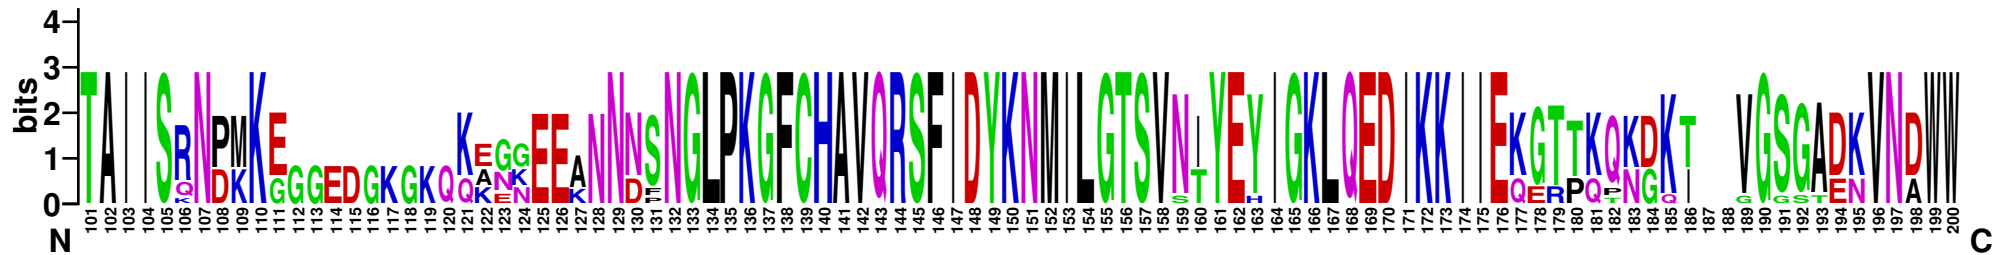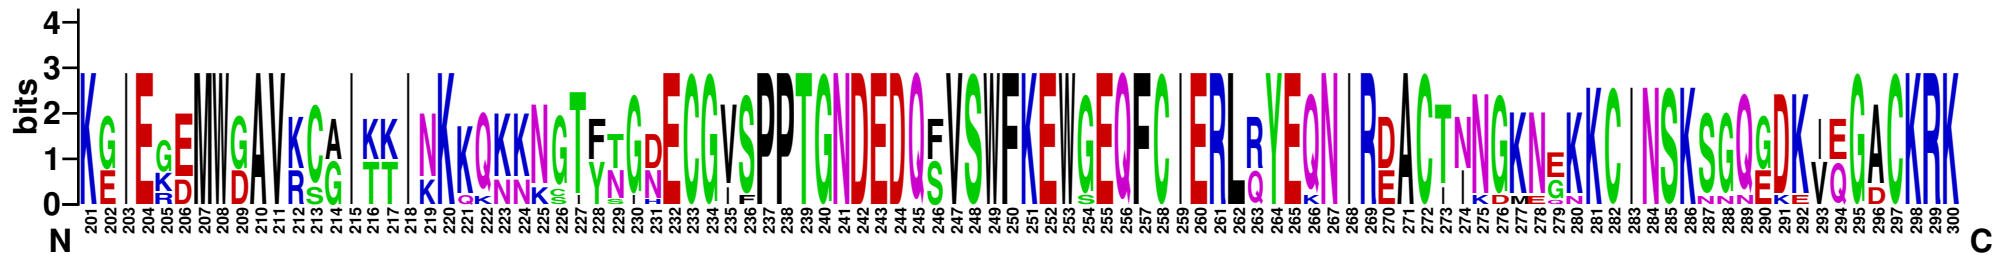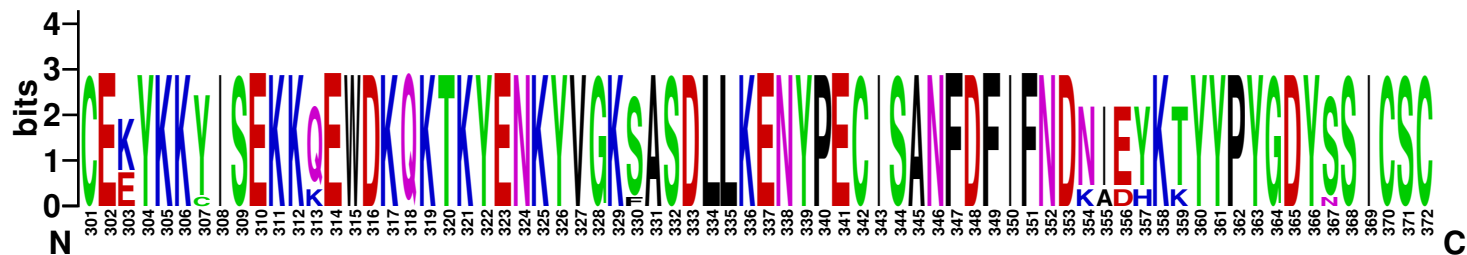

Supplement: S4 (10.1371/journal.pcbi.1000933.s004) [file journal.pcbi.1000933.s004]

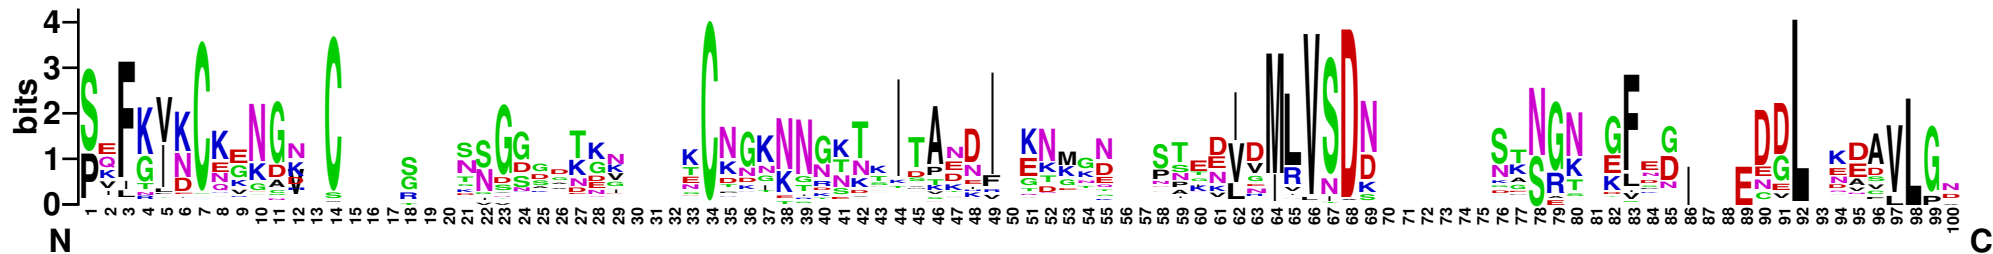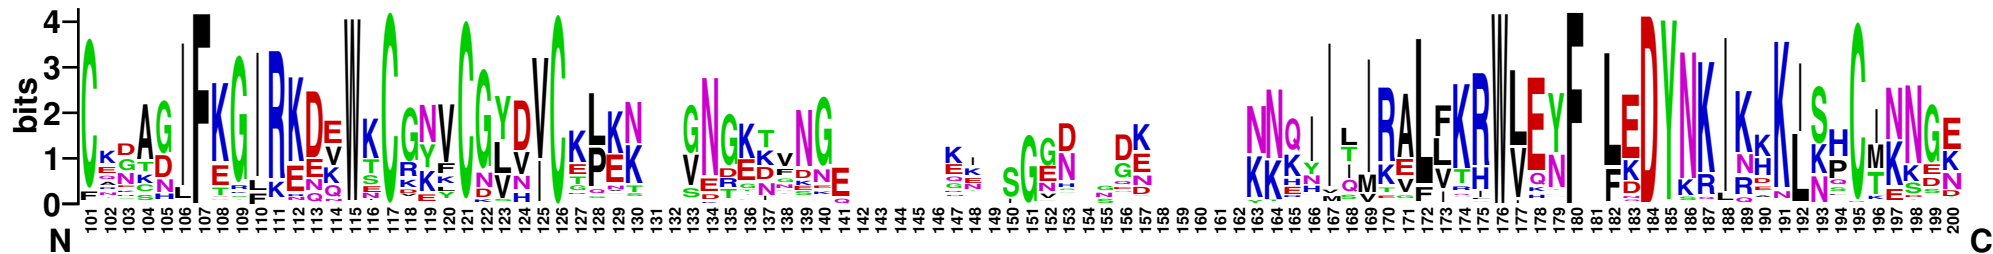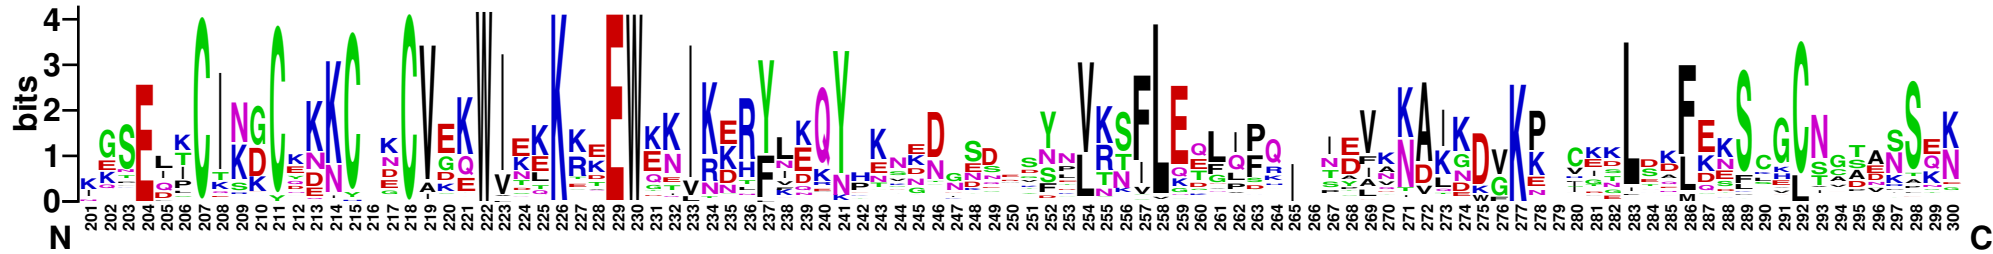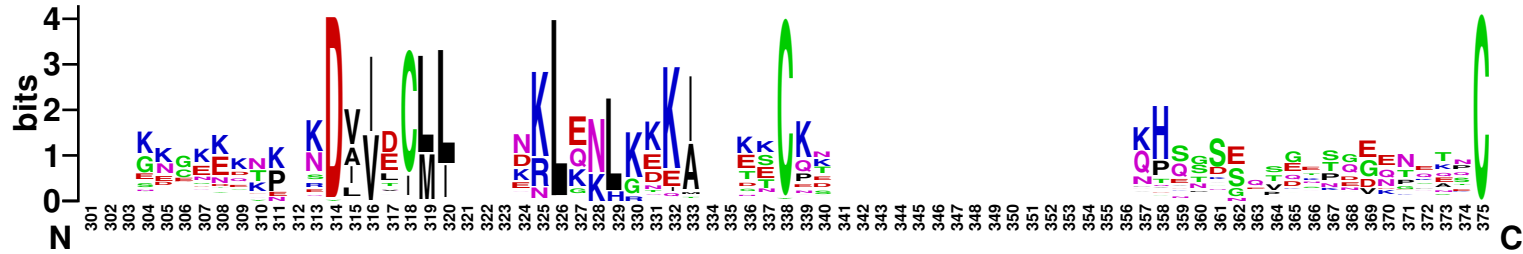

Supplement: S4 (10.1371/journal.pcbi.1000933.s004) [file journal.pcbi.1000933.s004]

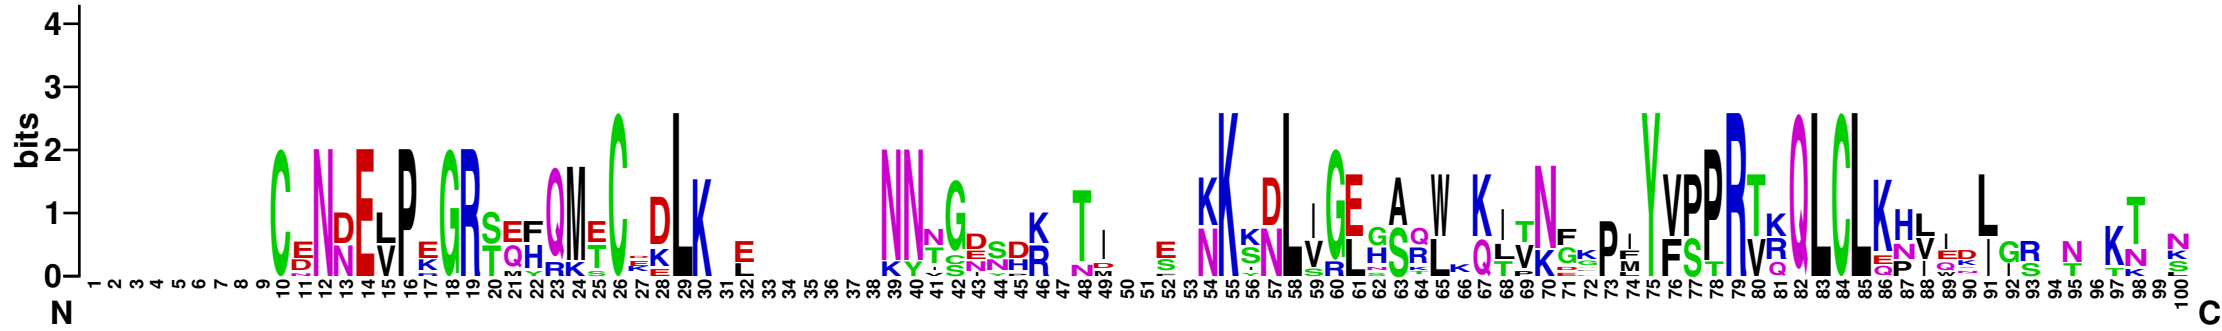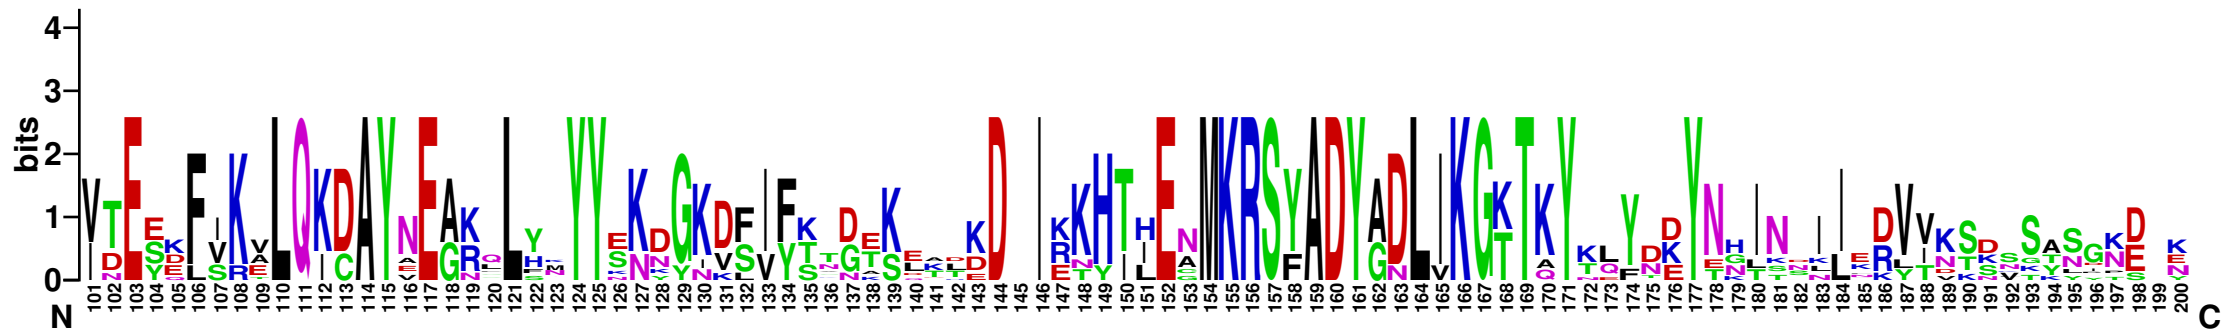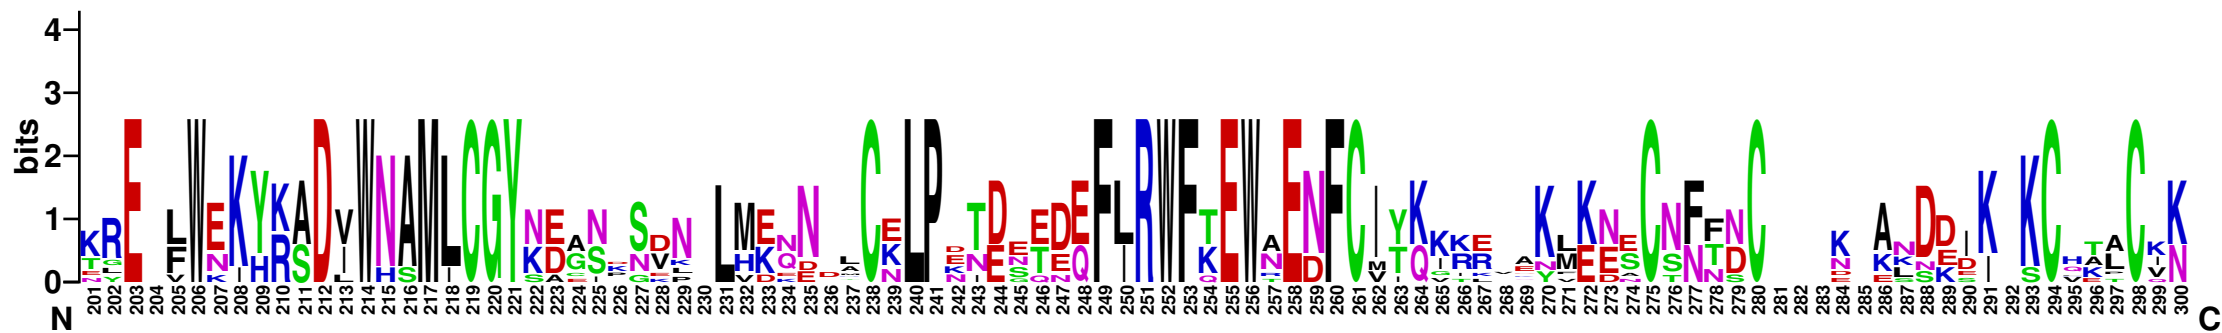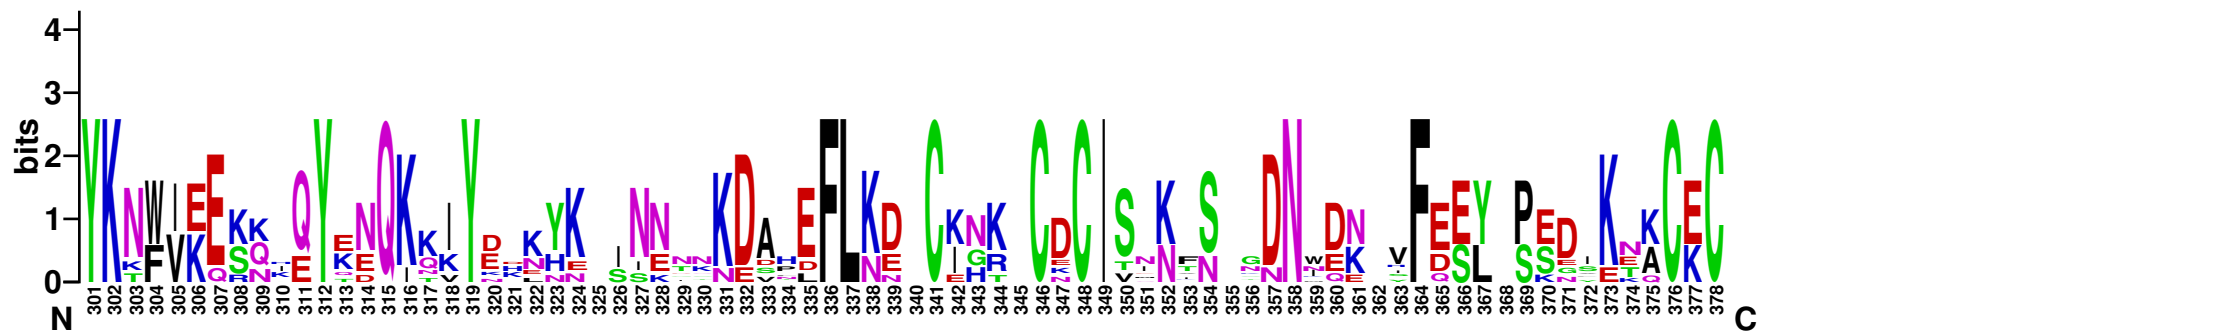

Supplement: S4 (10.1371/journal.pcbi.1000933.s004) [file journal.pcbi.1000933.s004]

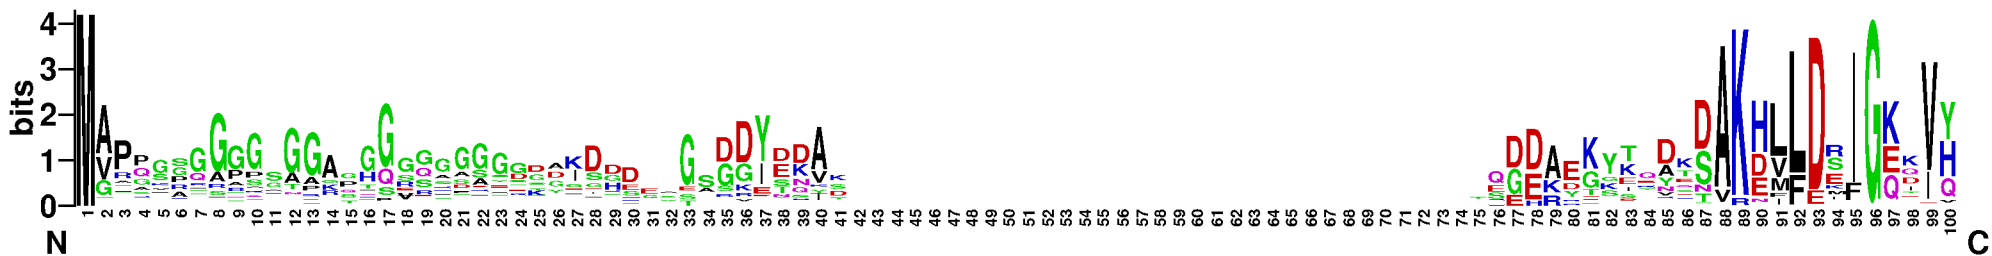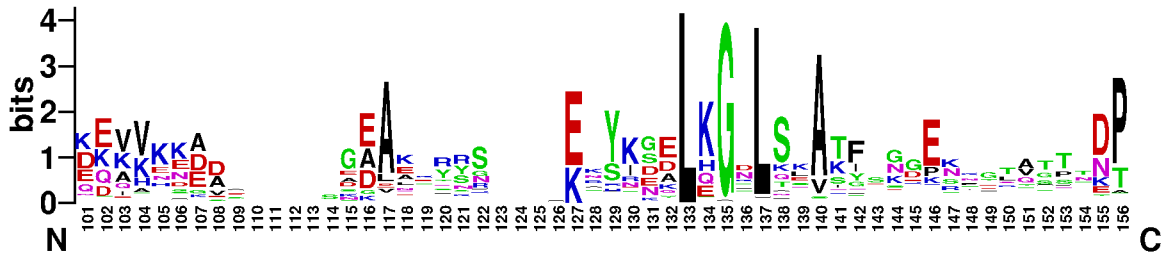

NTSB

Supplement: S4 (10.1371/journal.pcbi.1000933.s004) [file journal.pcbi.1000933.s004]

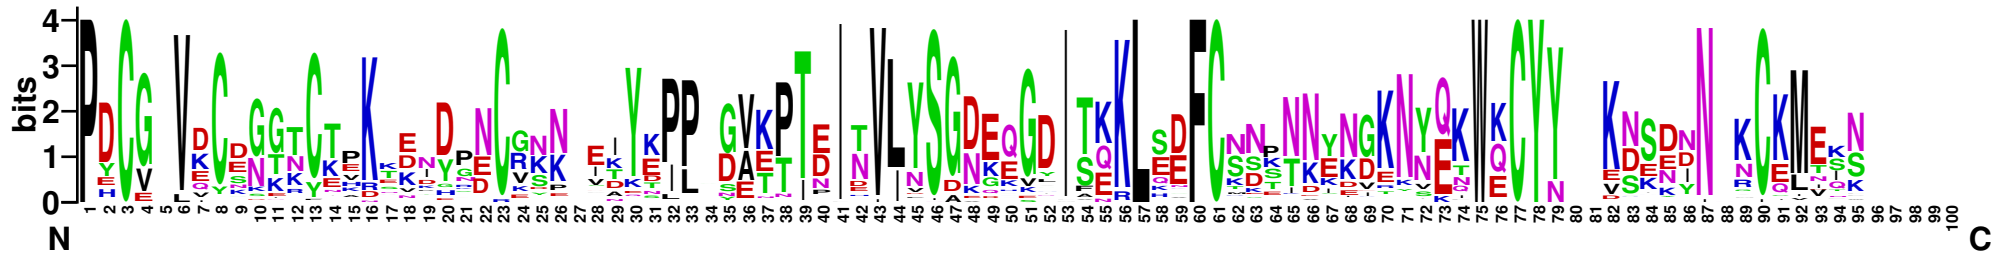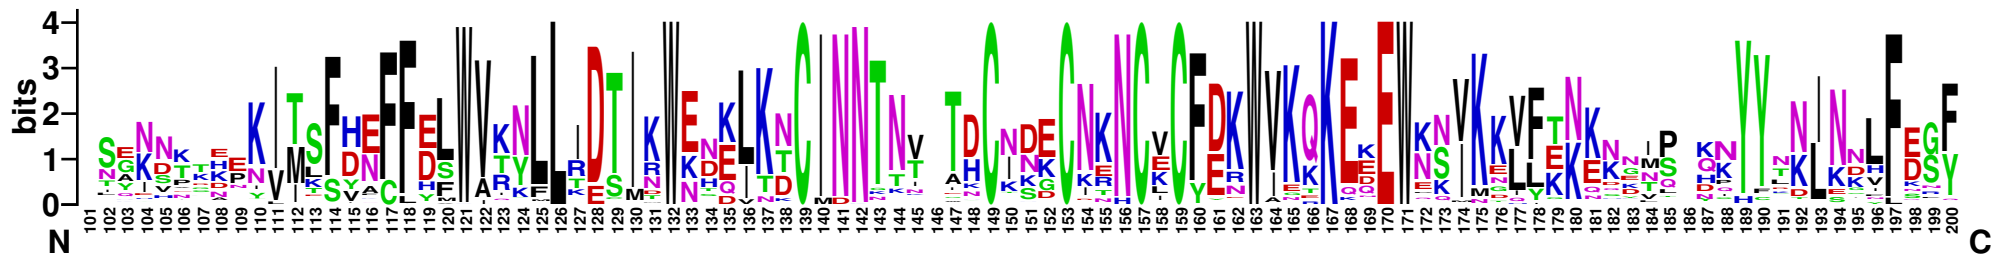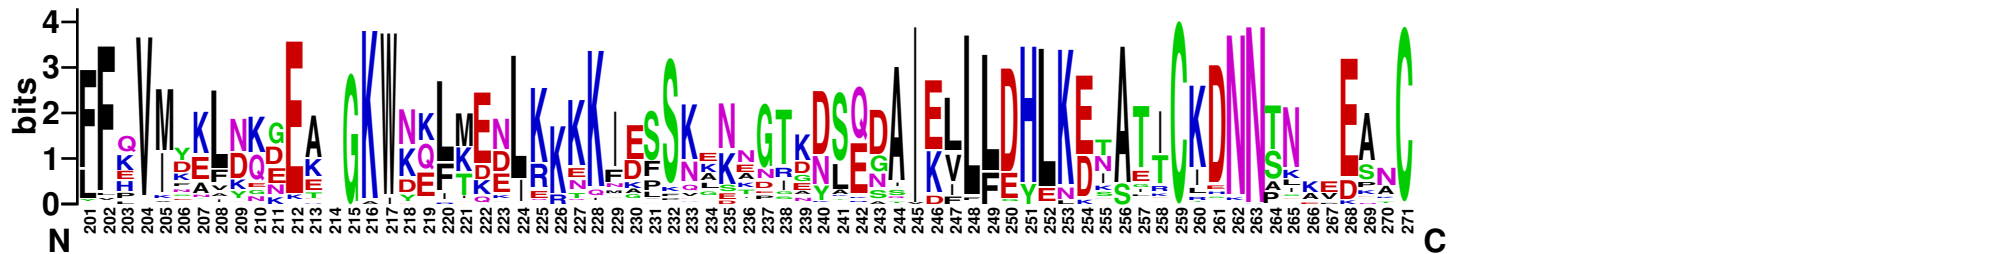

Supplement: S4 (10.1371/journal.pcbi.1000933.s004) [file journal.pcbi.1000933.s004]

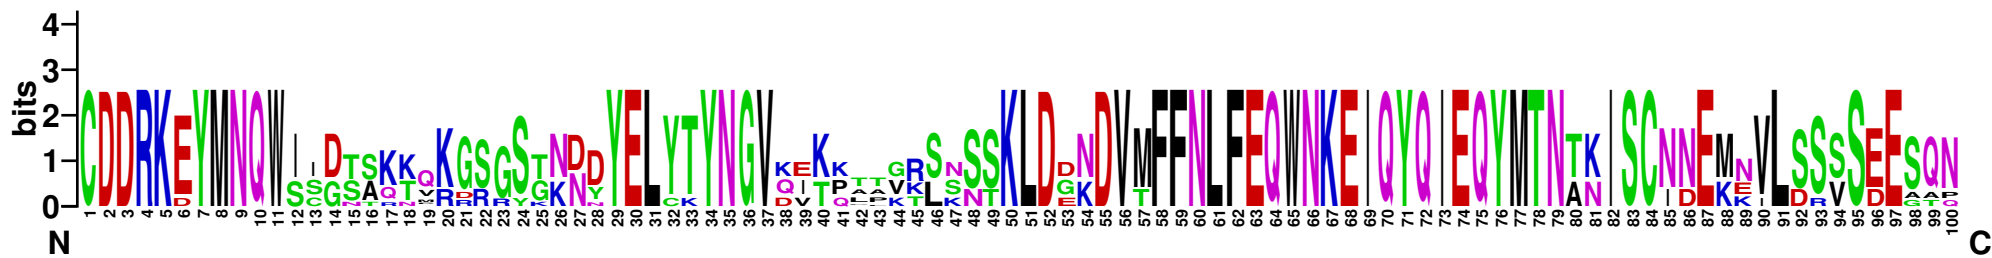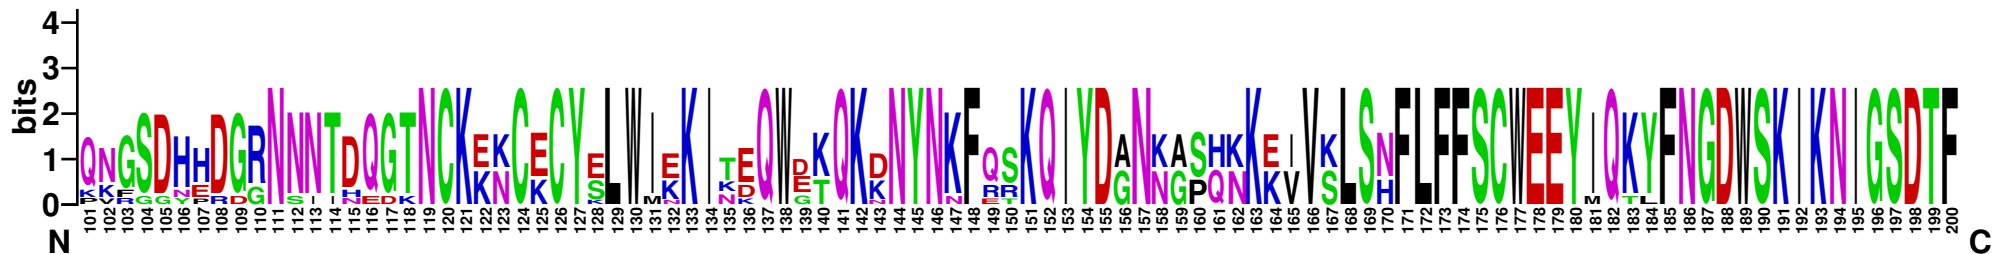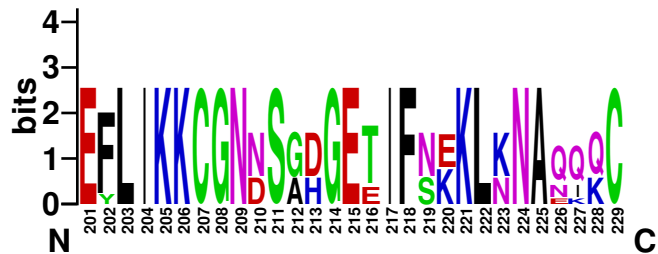

Supplement: S4 (10.1371/journal.pcbi.1000933.s004) [file journal.pcbi.1000933.s004]

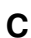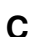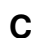

Supplement: S4 (10.1371/journal.pcbi.1000933.s004) [file journal.pcbi.1000933.s004]

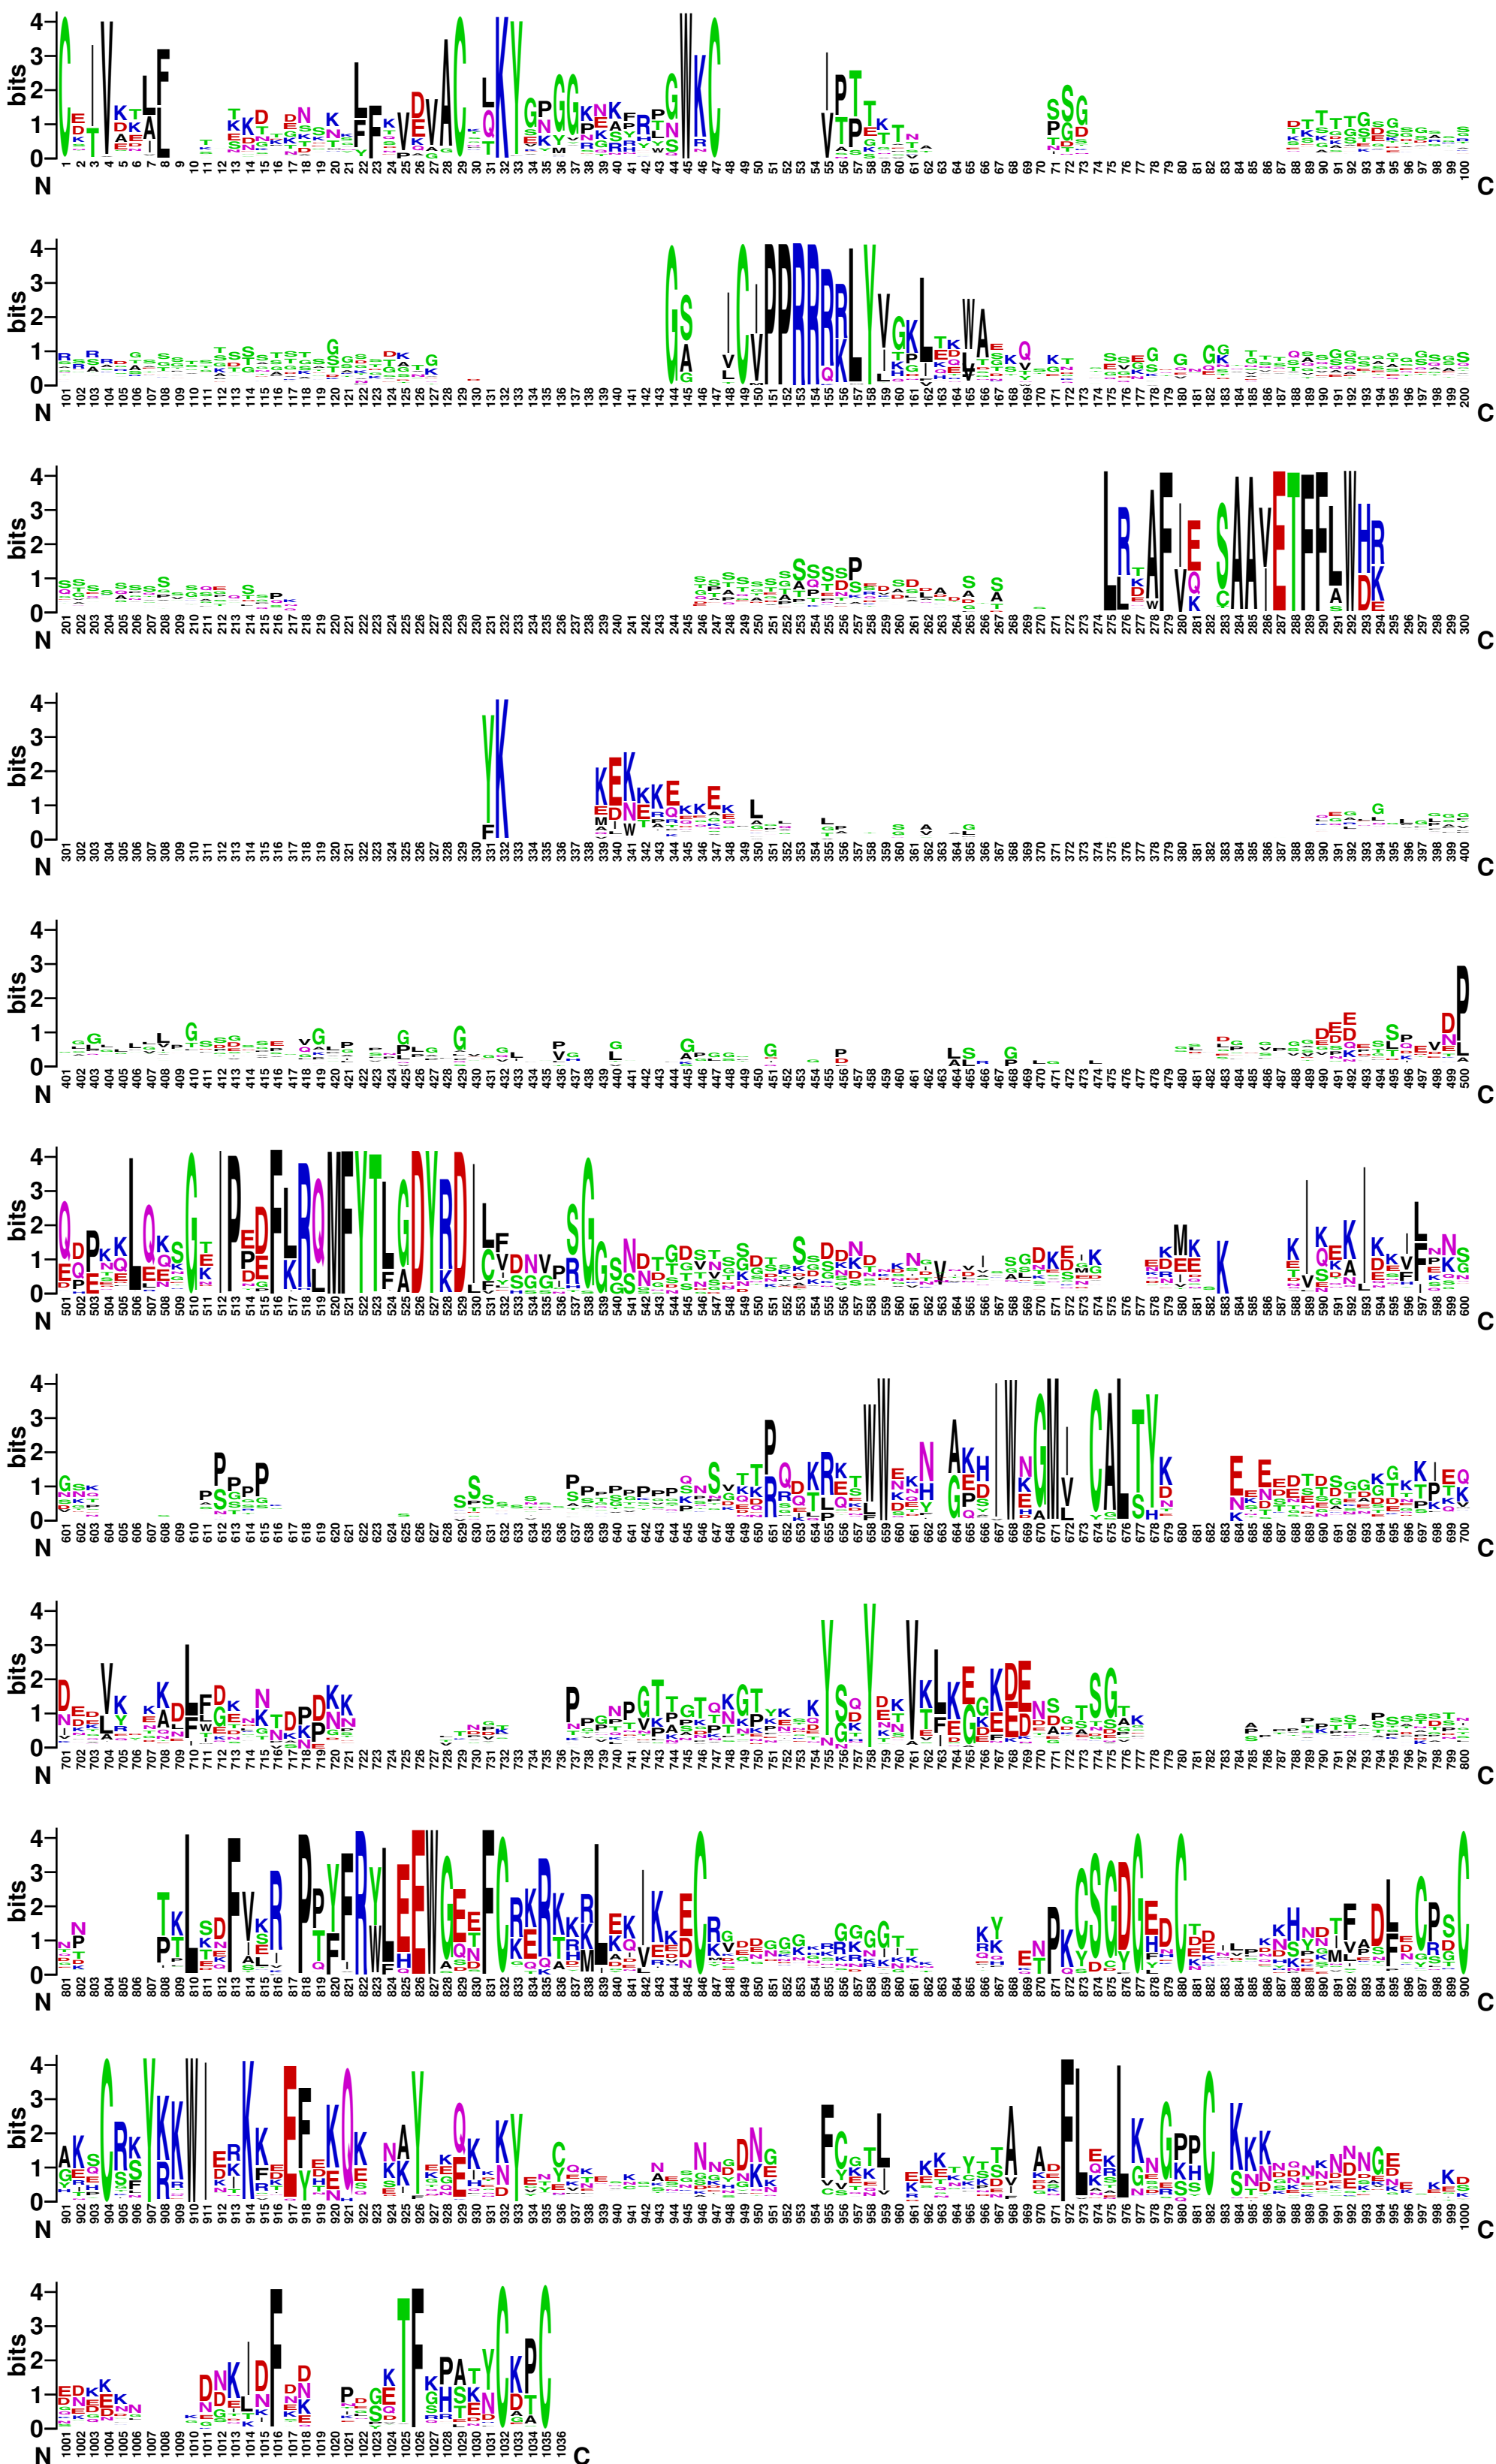

Supplement: S4 (10.1371/journal.pcbi.1000933.s004) [file journal.pcbi.1000933.s004]

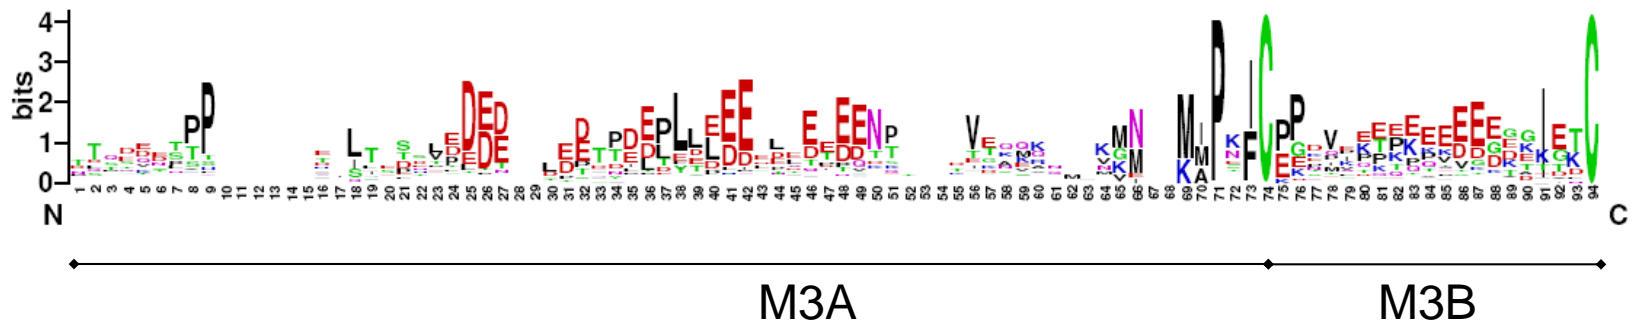

Supplement: S4 (10.1371/journal.pcbi.1000933.s004) [file journal.pcbi.1000933.s004]

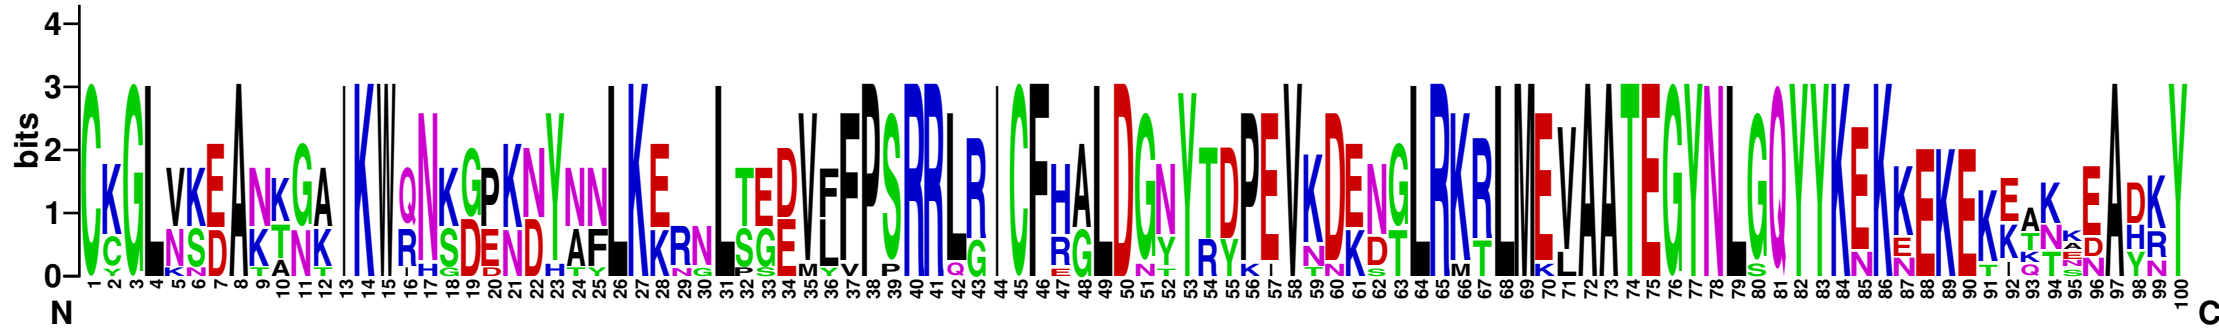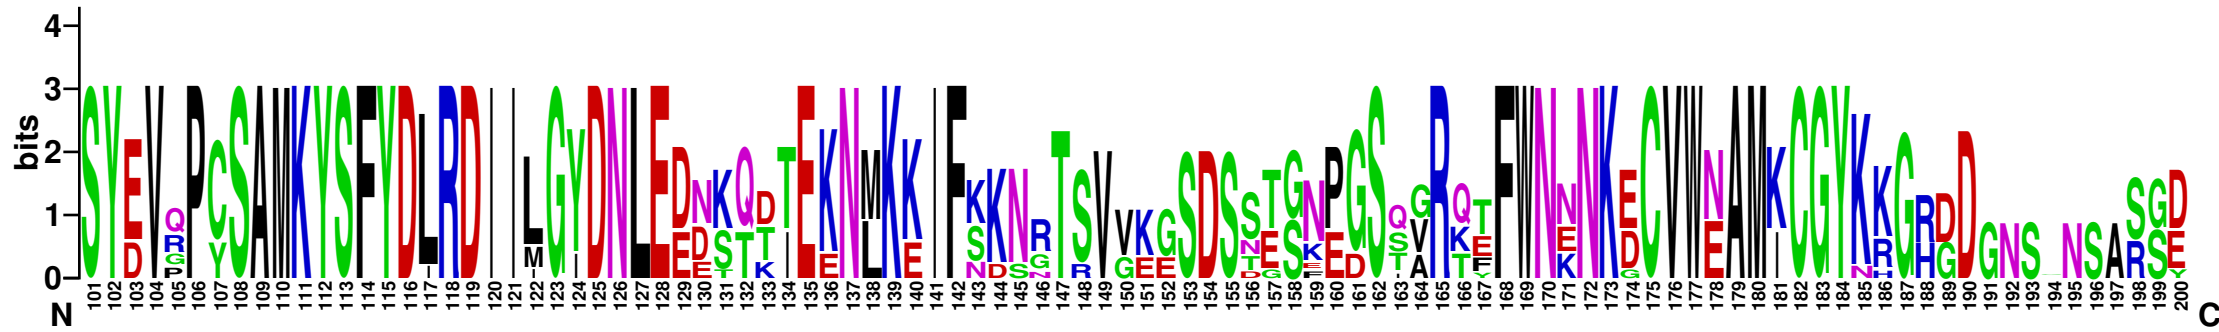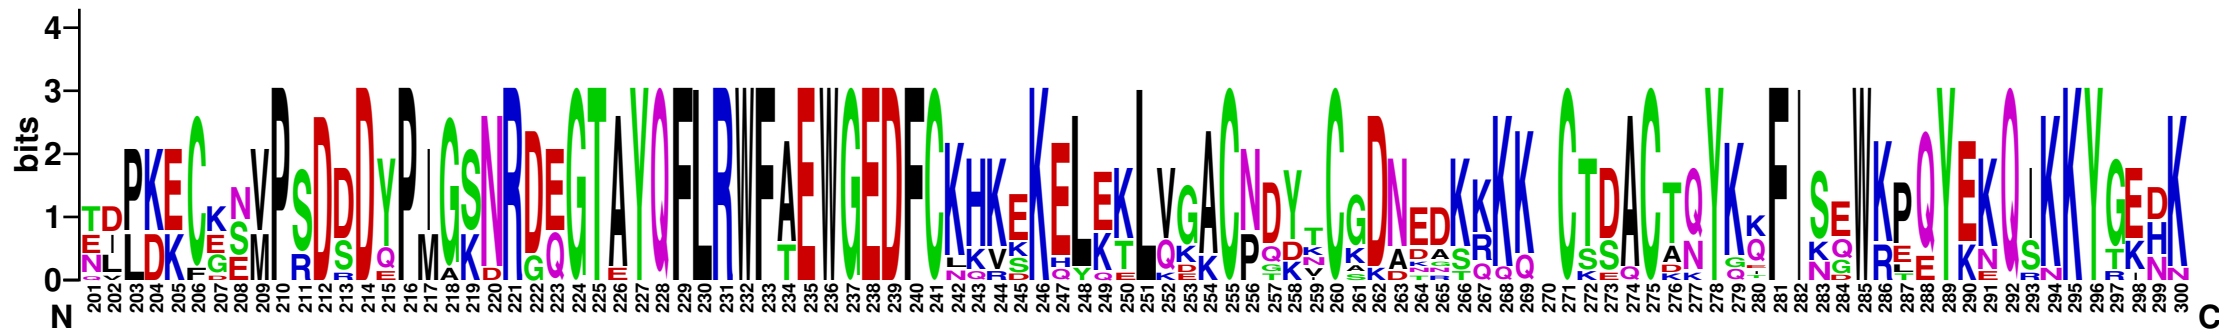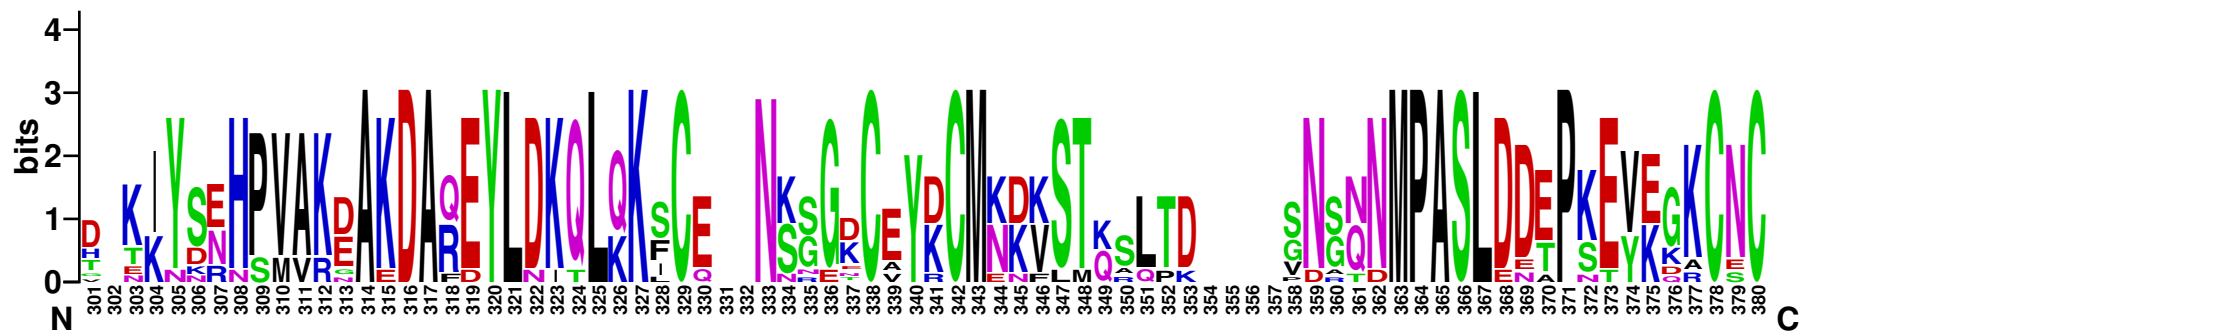

Supplement: S4 (10.1371/journal.pcbi.1000933.s004) [file journal.pcbi.1000933.s004]

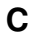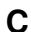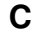

Supplement: S4 (10.1371/journal.pcbi.1000933.s004) [file journal.pcbi.1000933.s004]

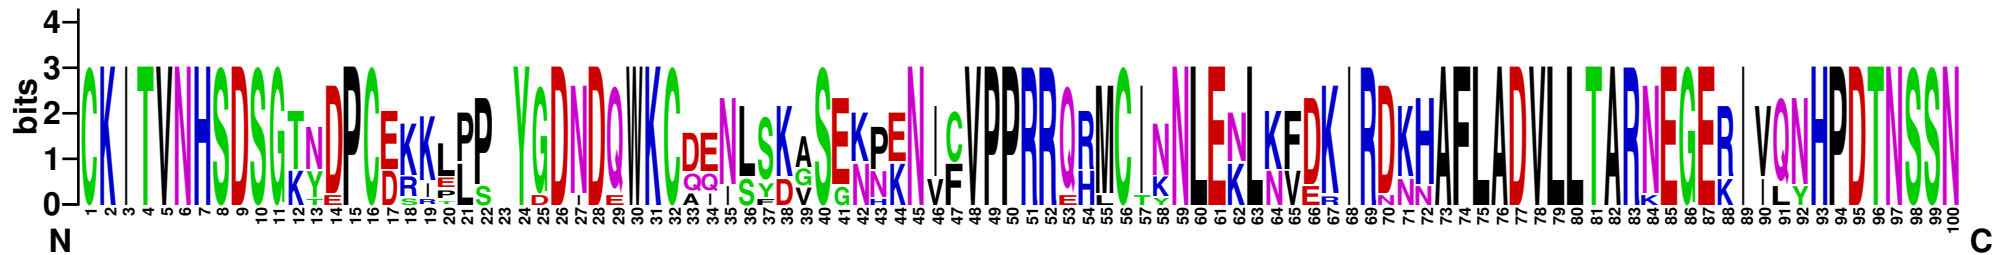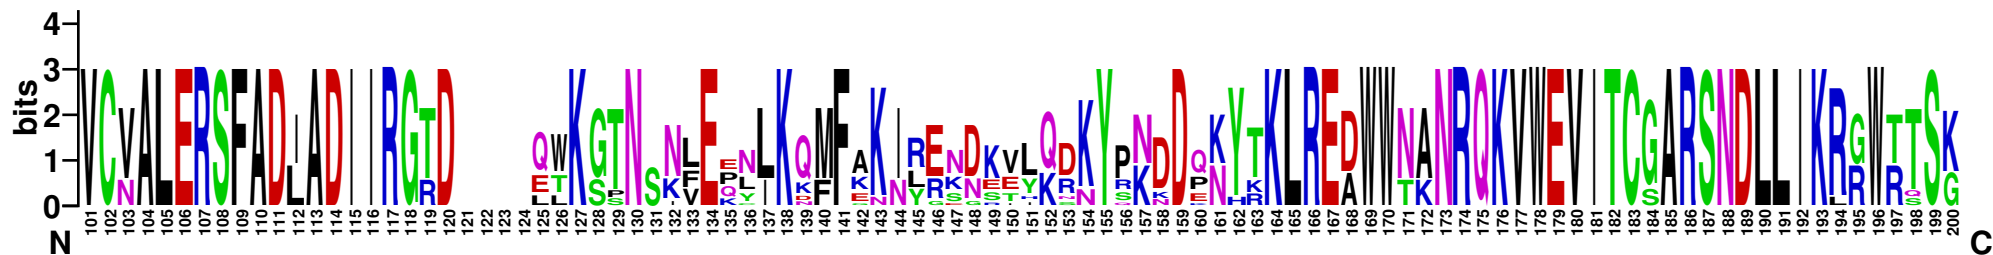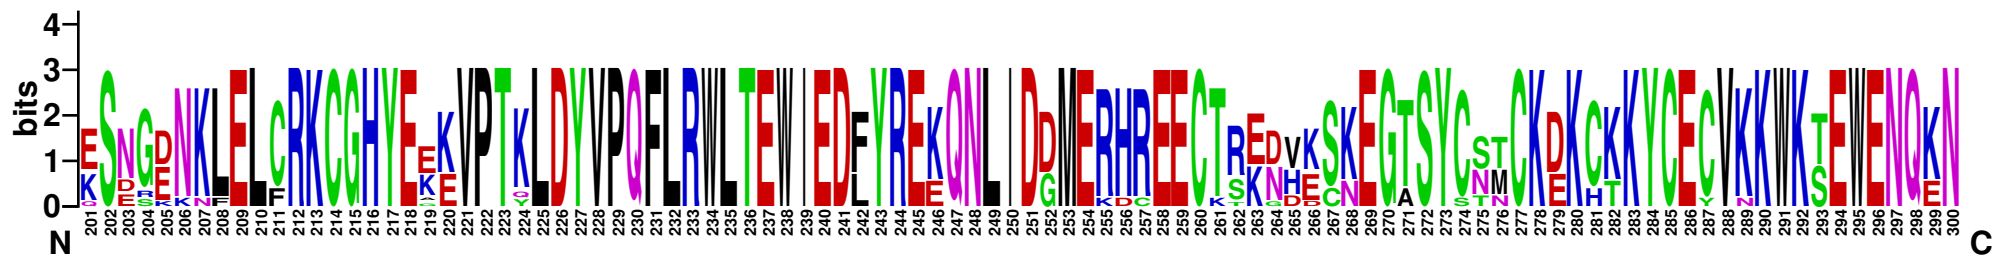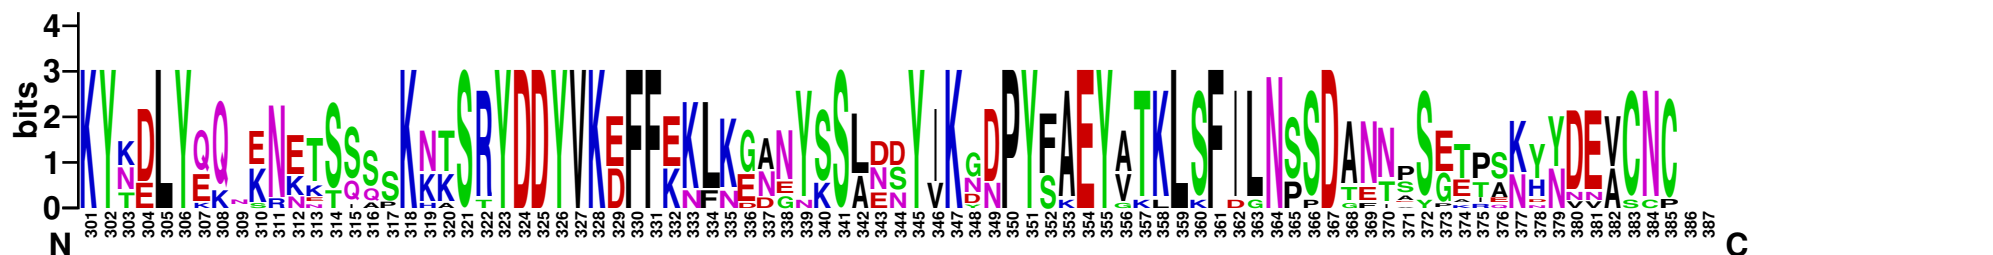

Supplement: S4 (10.1371/journal.pcbi.1000933.s004) [file journal.pcbi.1000933.s004]

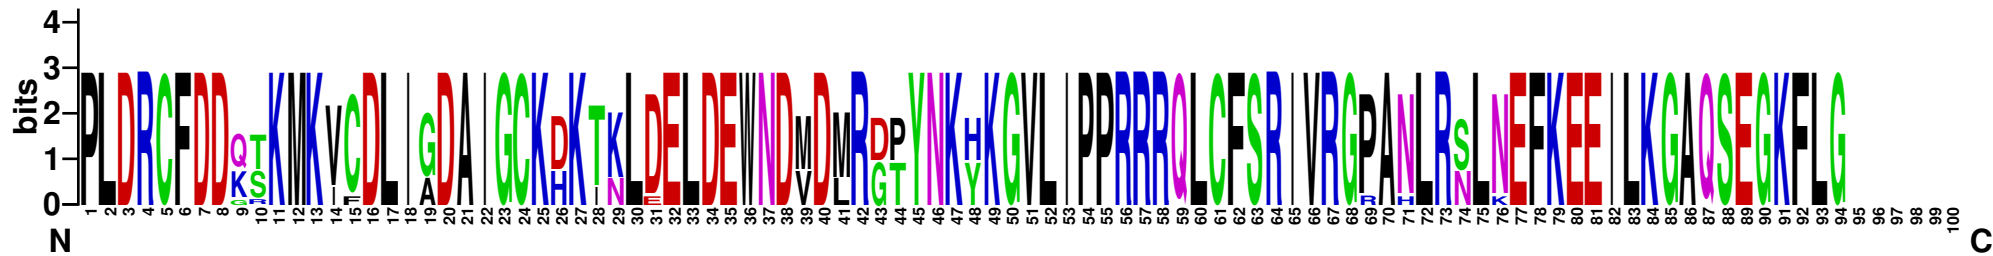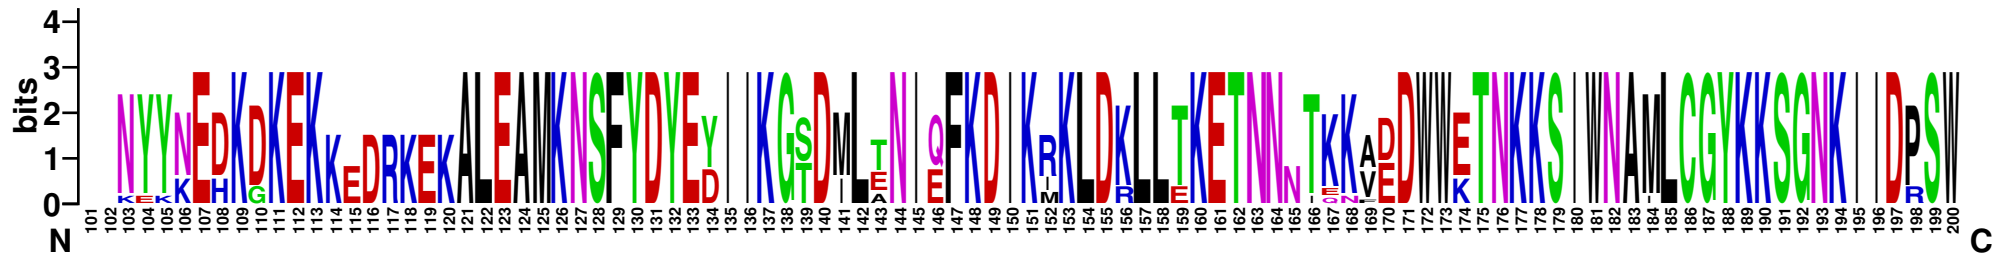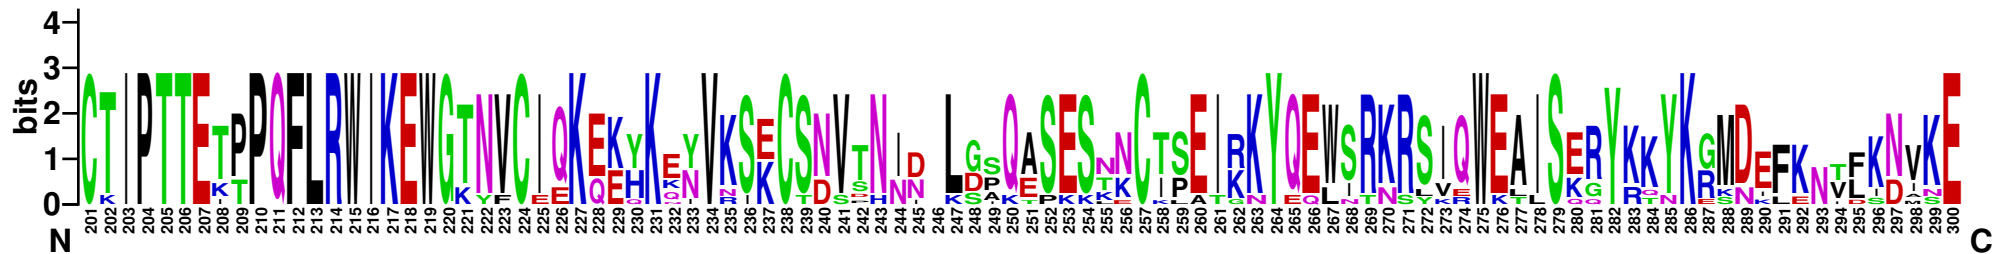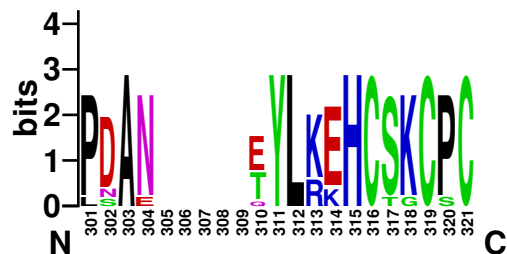

Supplement: S4 (10.1371/journal.pcbi.1000933.s004) [file journal.pcbi.1000933.s004]

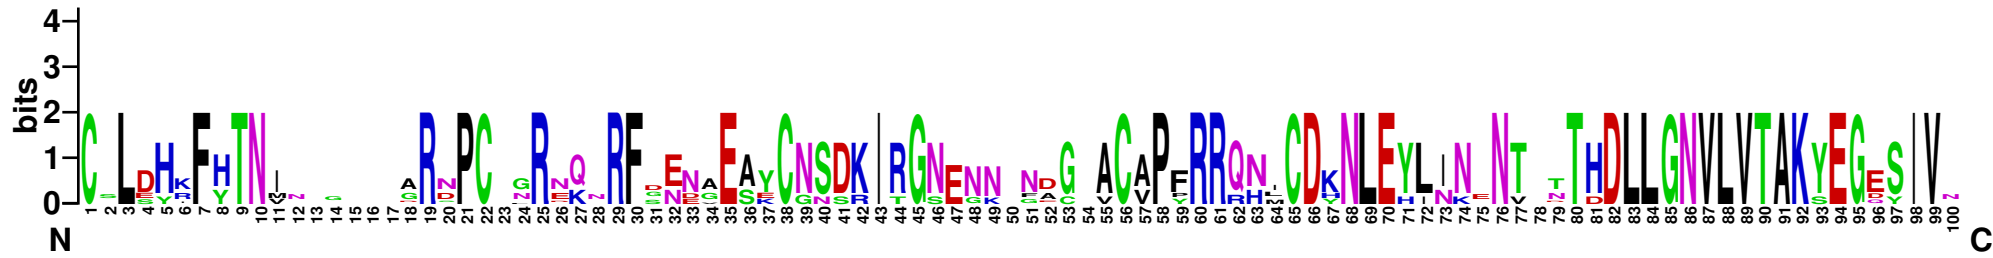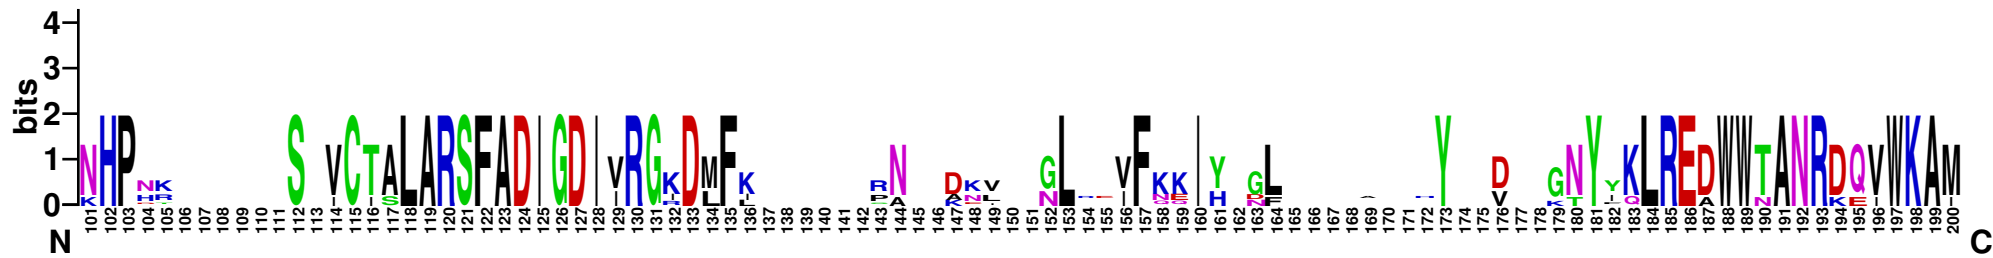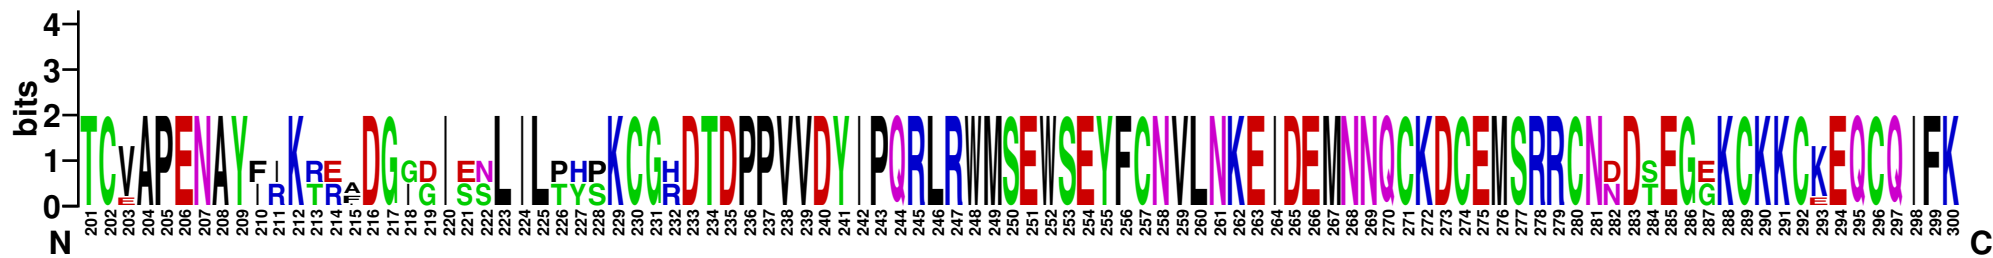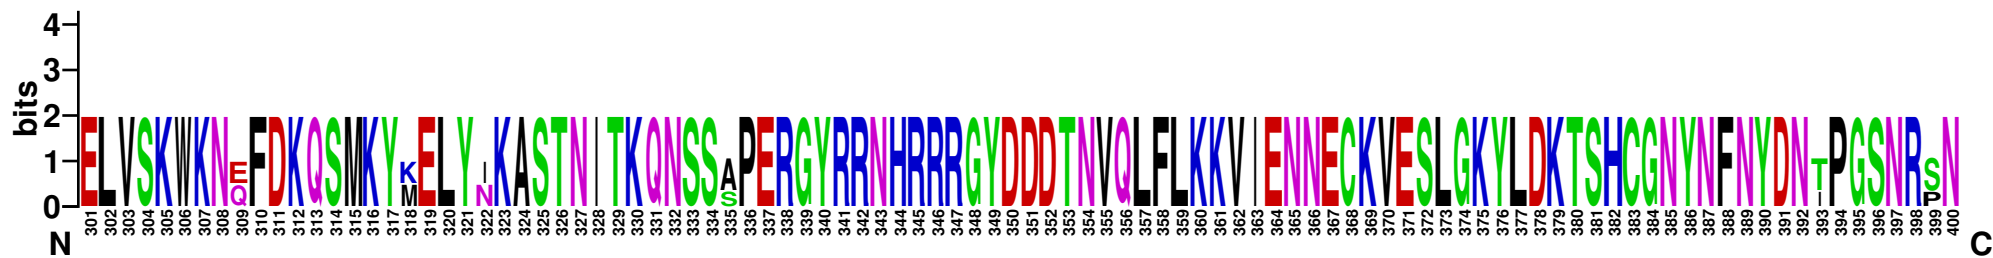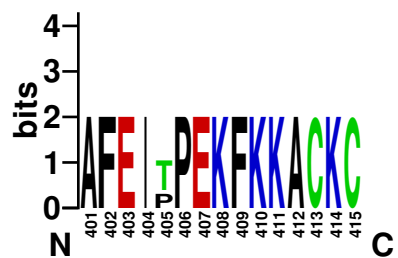

Supplement: S4 (10.1371/journal.pcbi.1000933.s004) [file journal.pcbi.1000933.s004]

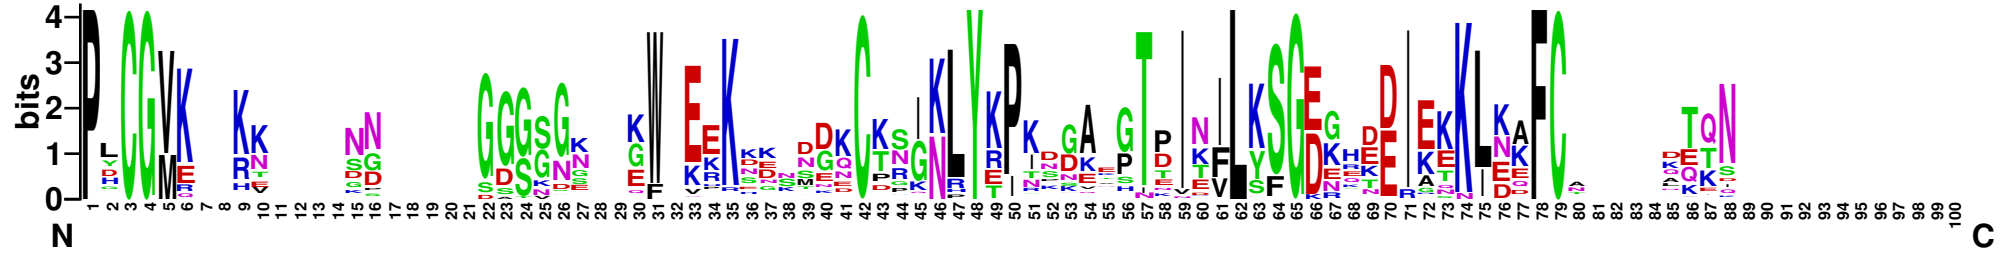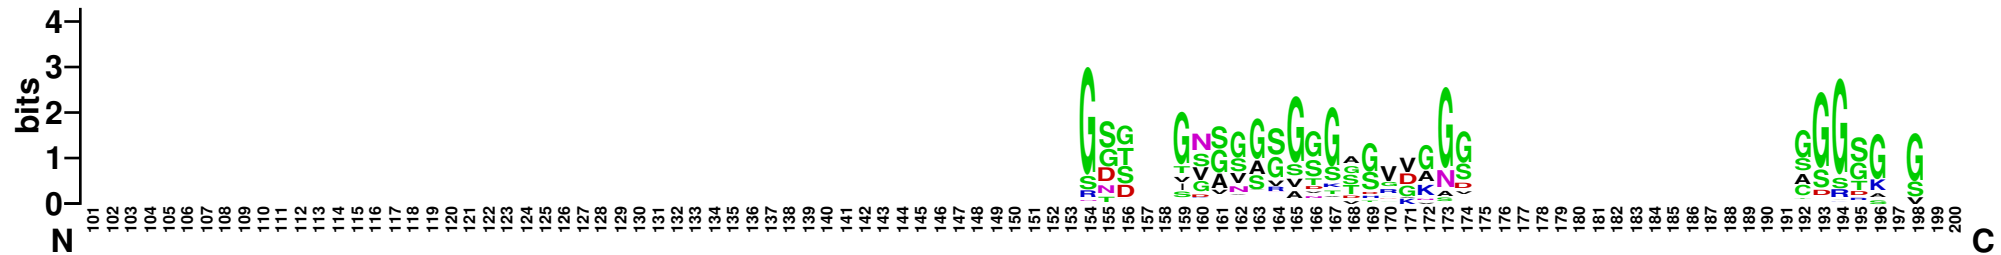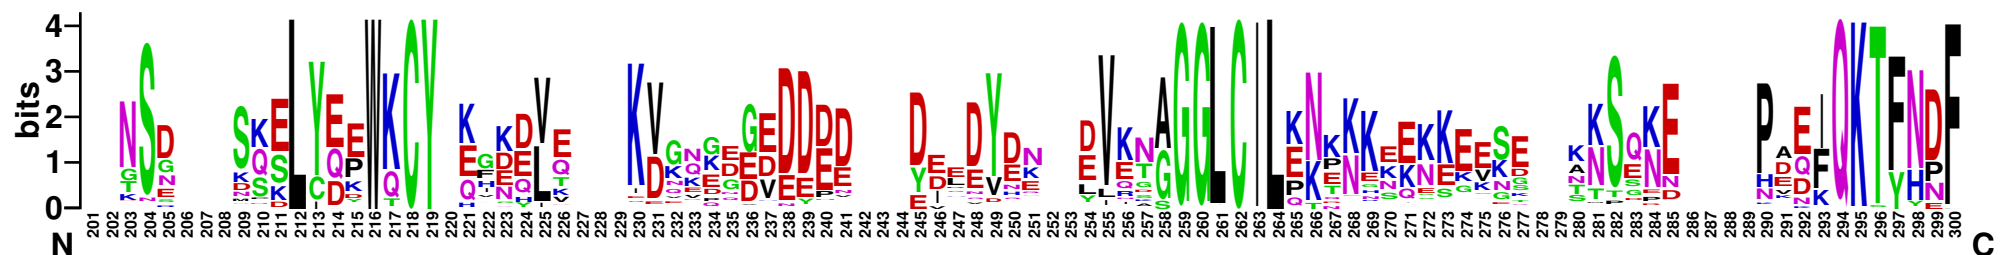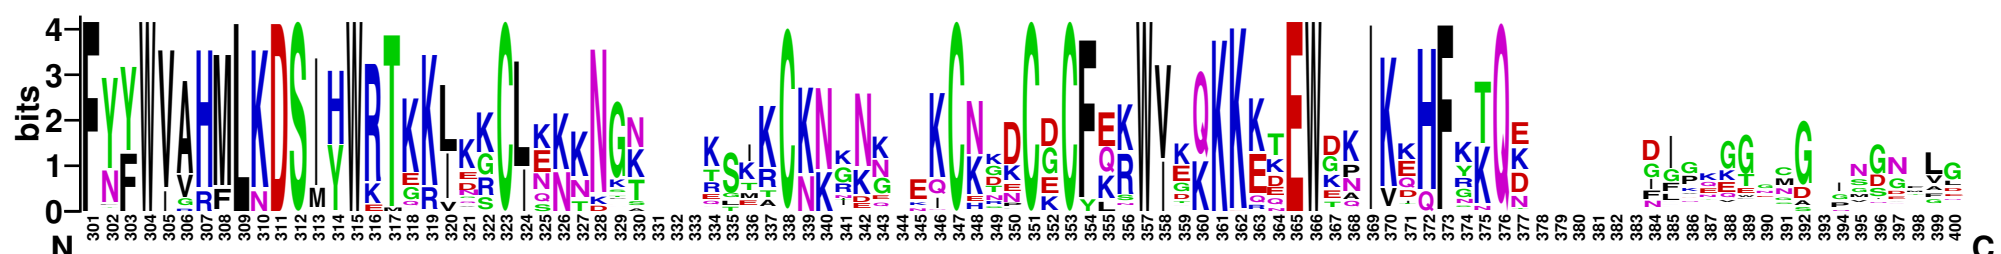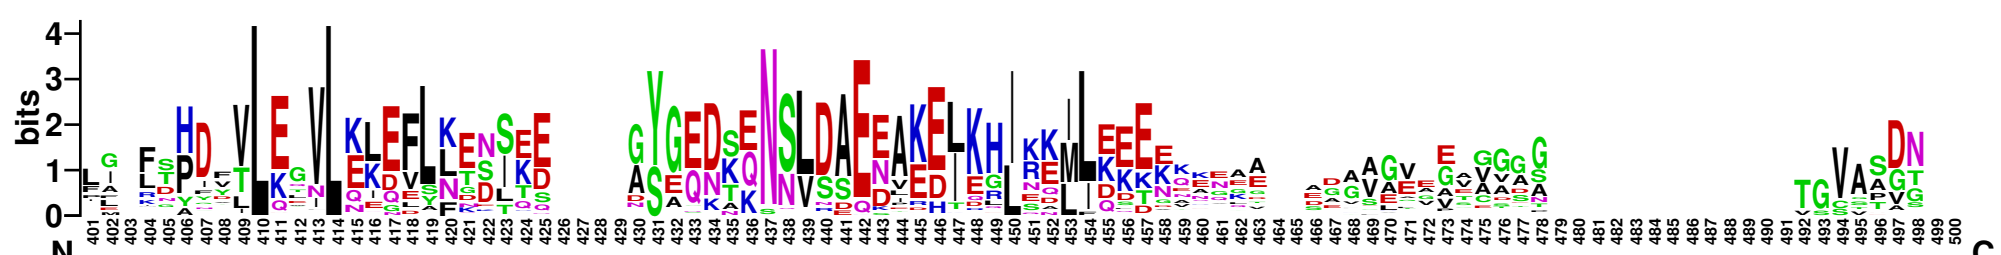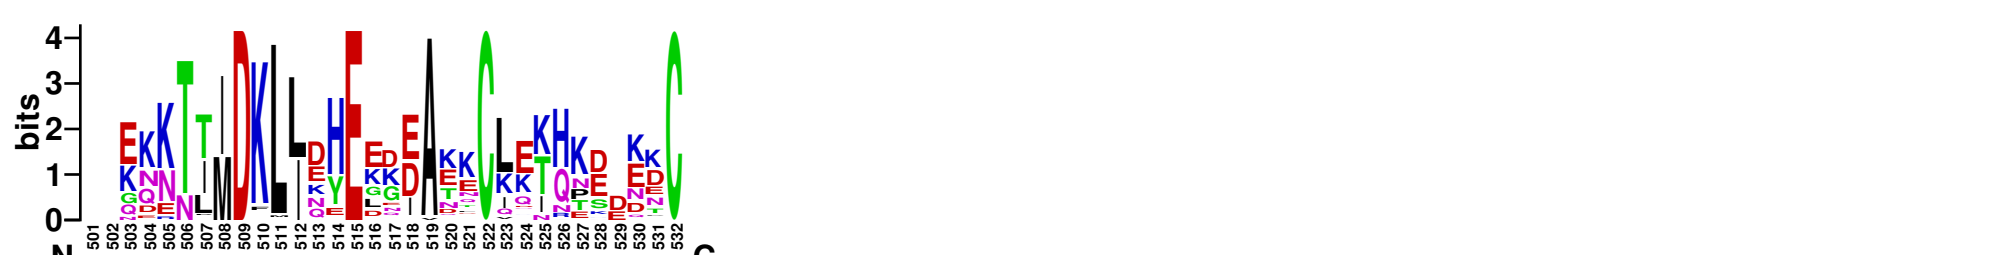

Supplement: S4 (10.1371/journal.pcbi.1000933.s004) [file journal.pcbi.1000933.s004]

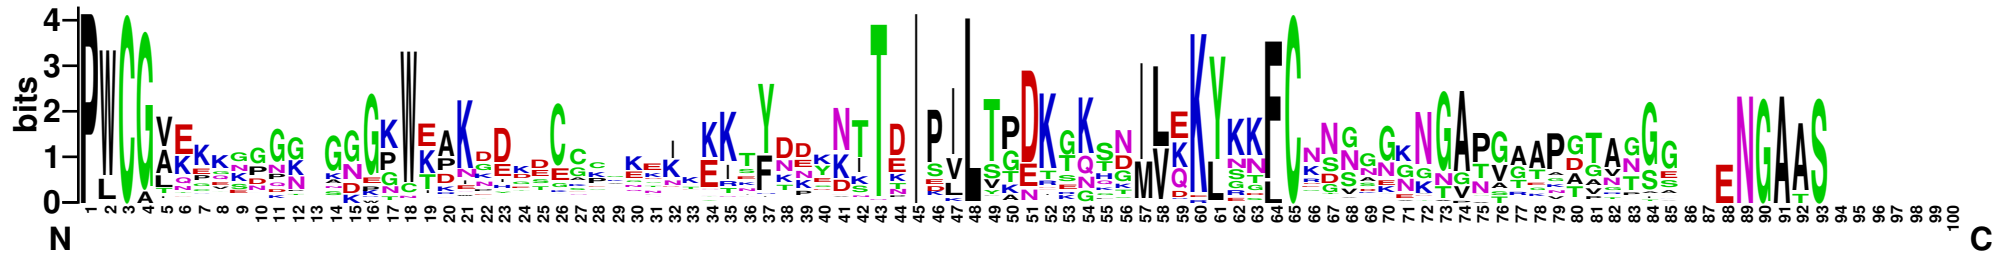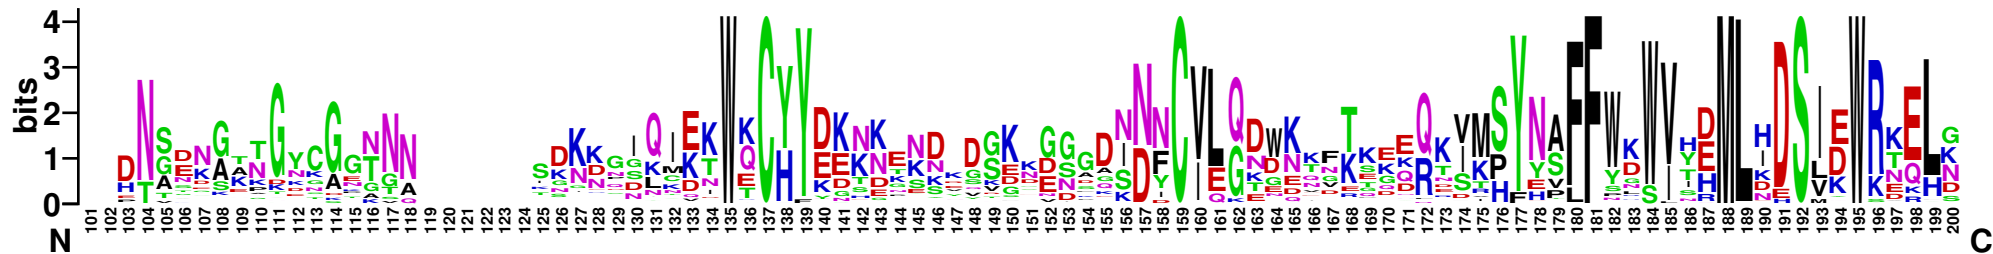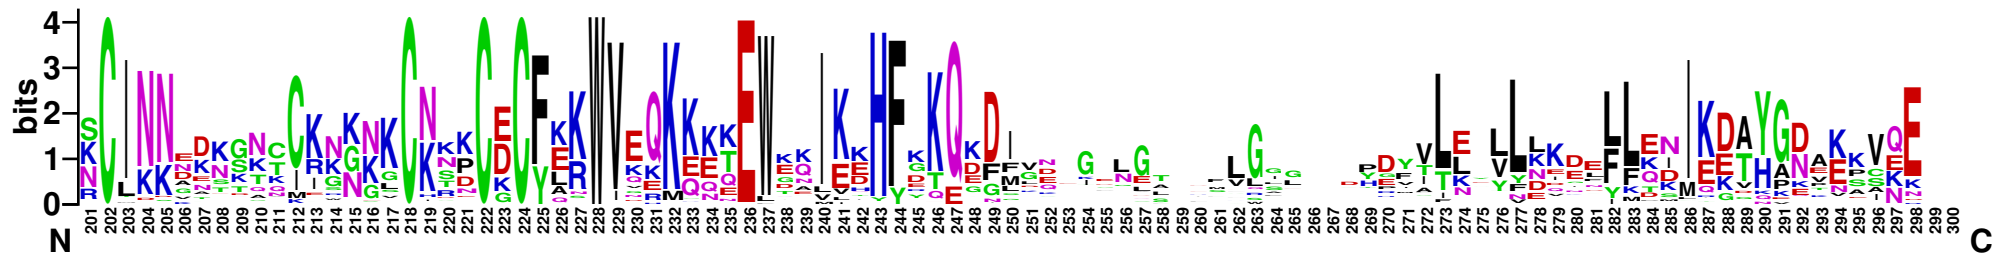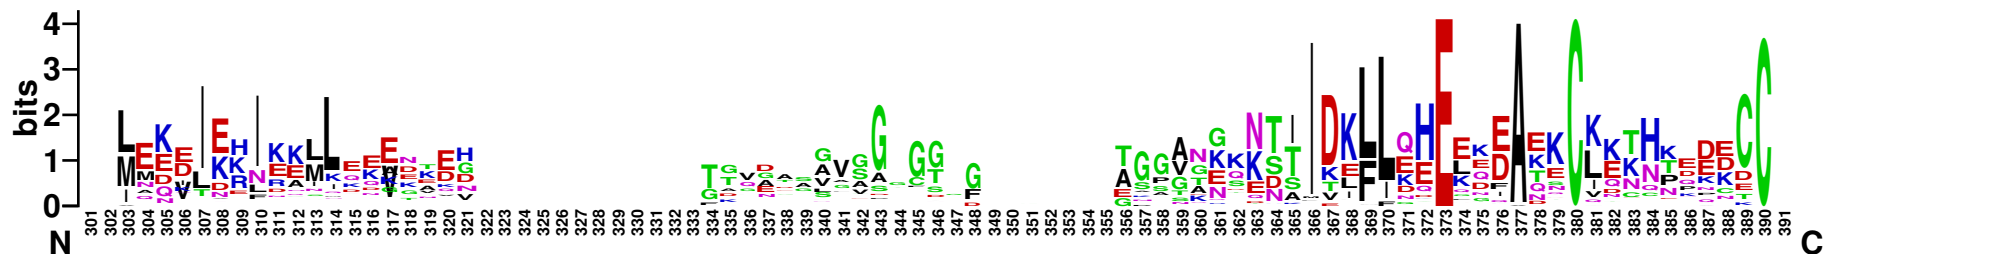

Supplement: S4 (10.1371/journal.pcbi.1000933.s004) [file journal.pcbi.1000933.s004]

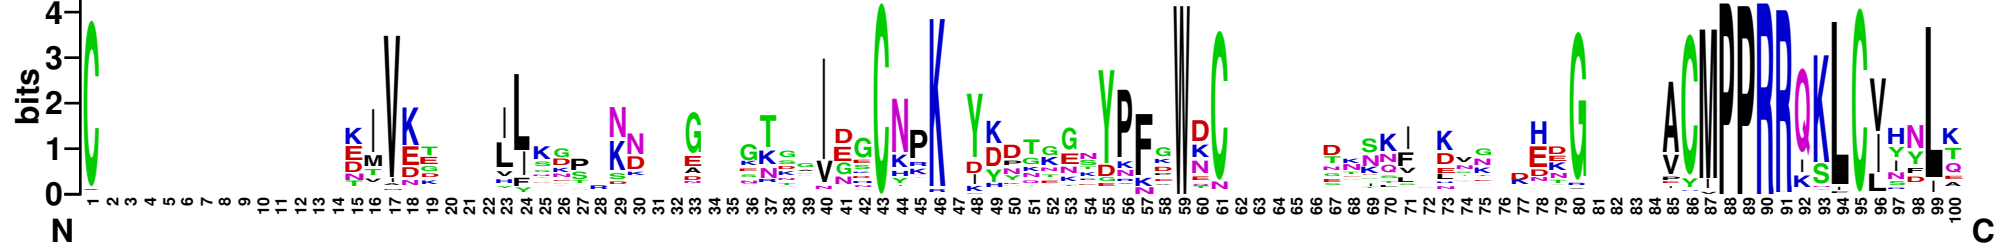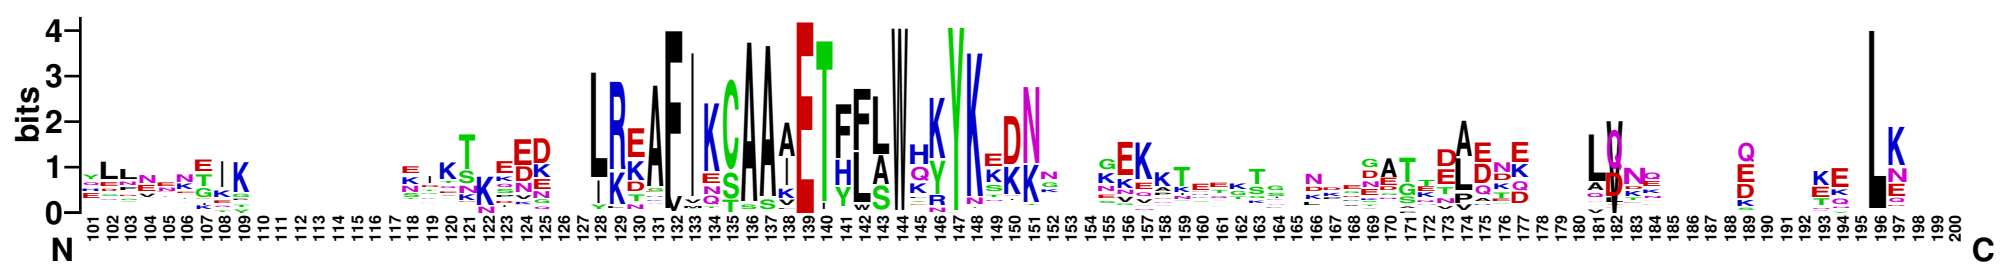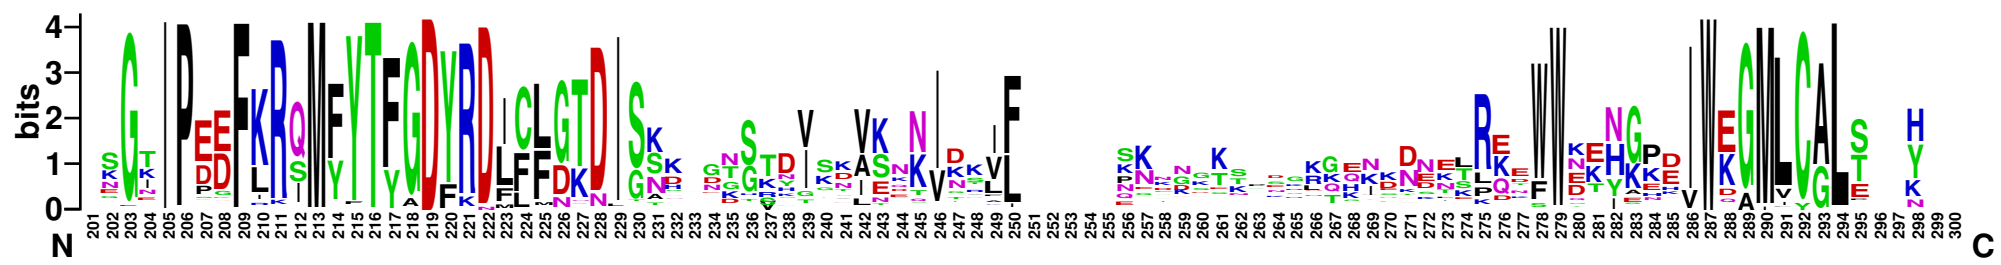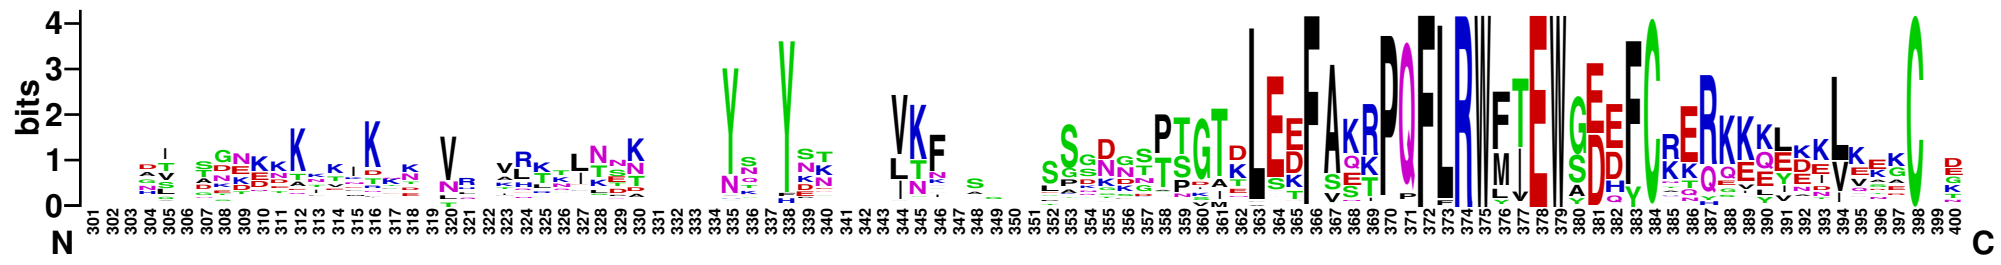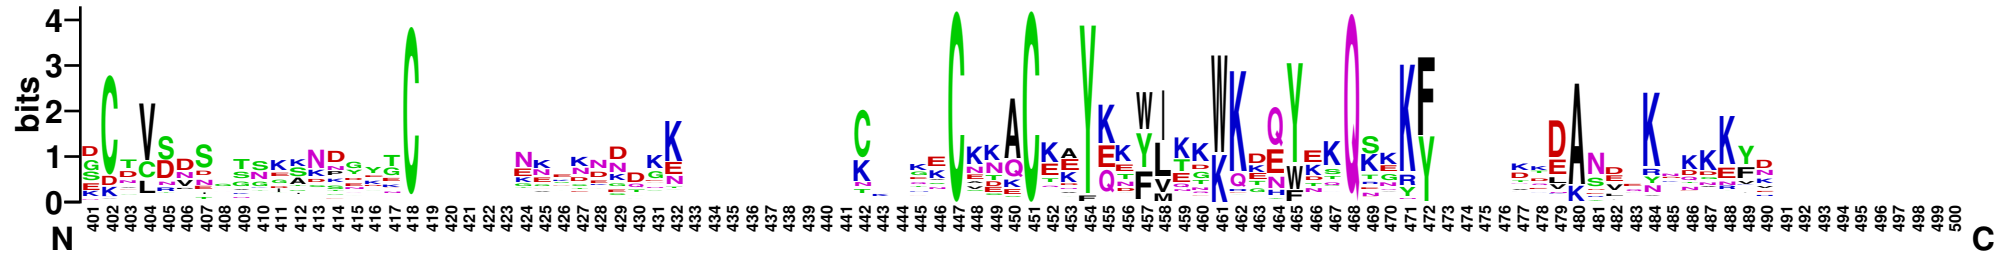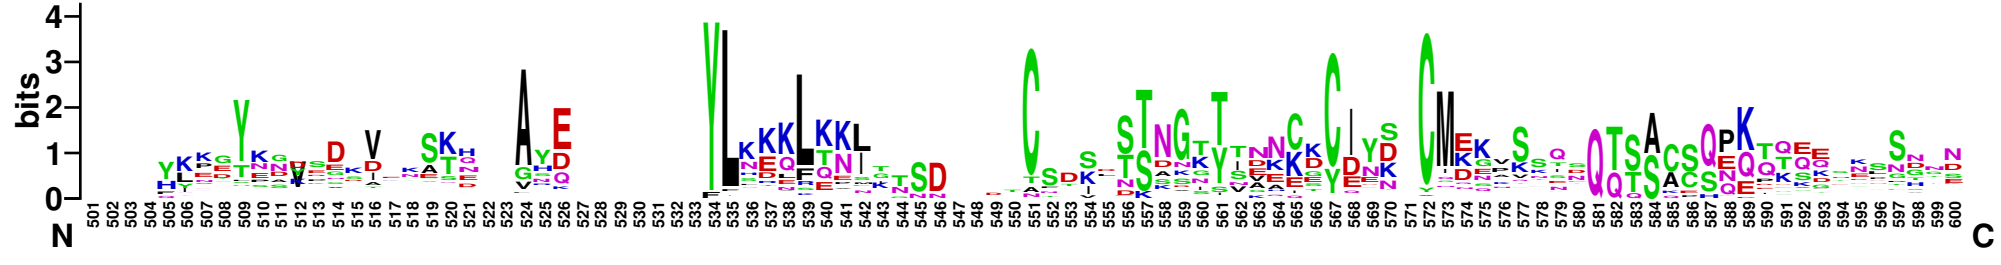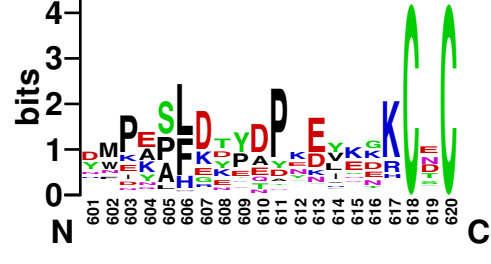

Supplement: S4 (10.1371/journal.pcbi.1000933.s004) [file journal.pcbi.1000933.s004]

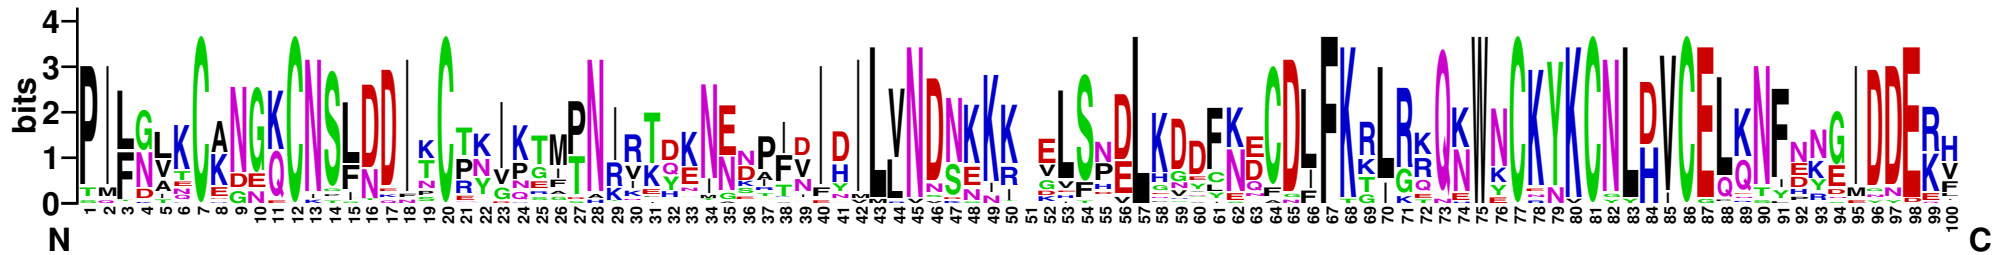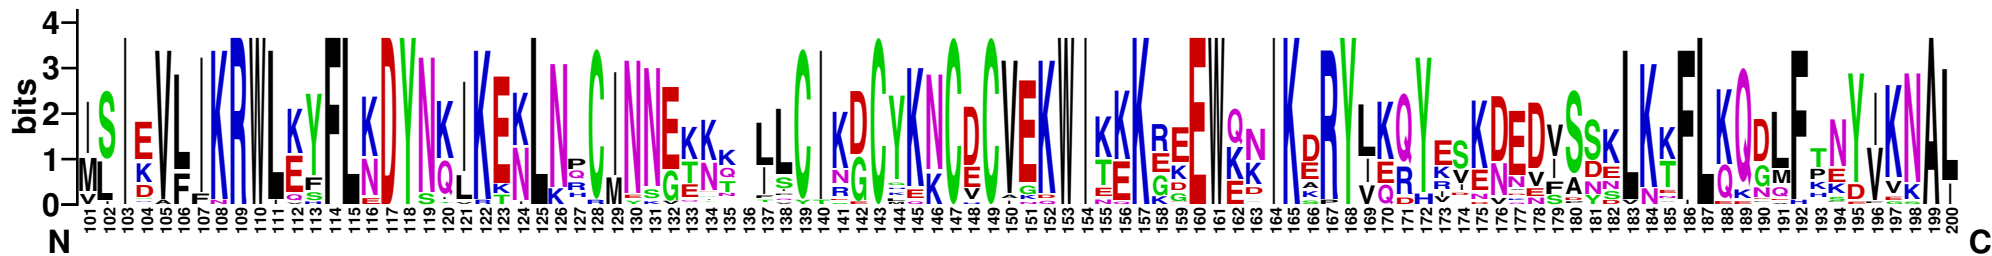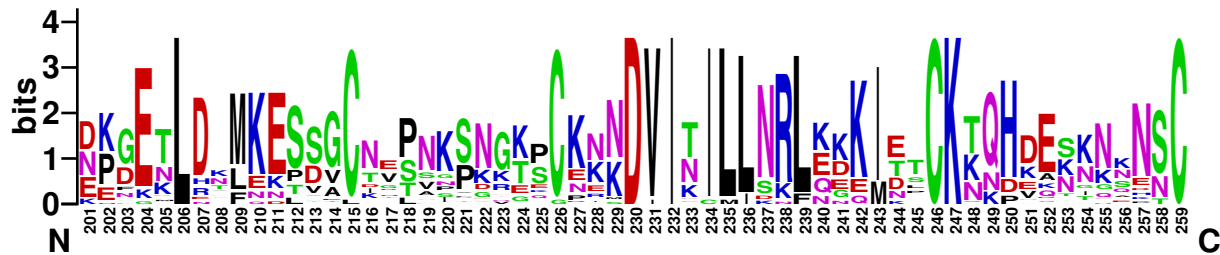

Supplement: S4 (10.1371/journal.pcbi.1000933.s004) [file journal.pcbi.1000933.s004]
